# Supplementary material for: A high-nuclearity isopolyoxotungstate based manganese cluster: one-pot synthesis and step-by-step assembly
Source: Royal Society of Chemistry journal article supplement (doi:10.1039/c8cc01622d), 2018-01-01
Supplement: c8cc01622d1.pdf [file c8cc01622d1.pdf]

Electronic Supplementary Material (ESI) for ChemComm.

This journal is © The Royal Society of Chemistry 2018

## Supporting Information

### **High-nuclearity isopolyoxotungstate based manganese cluster: one-pot synthesis and step-by-step assembly**

Chao Zhang,<sup>a</sup> Mengrui Zhang,<sup>a</sup> Hongyu Shi,<sup>b</sup> Qingdao Zeng,<sup>b</sup> Dongdi Zhang,<sup>a</sup> Yaqing Zhao,<sup>a</sup> Yuan Wang,<sup>a</sup> Pengtao Ma,<sup>a</sup> Jingping Wang<sup>\*a</sup> and Jingyang Niu<sup>\*a</sup>

<sup>a</sup> Henan Key Laboratory of Polyoxometalate Chemistry, College of Chemistry and Chemical Engineering, Henan University, Kaifeng, Henan 475004, P. R. China.

<sup>b</sup> CAS Key Laboratory of Standardization and Measurement for Nanotechnology, CAS Center for Excellence in Nanoscience, National Center for Nanoscience and Technology, No. 11 Beiyitiao, Zhongguancun, Beijing 100190, P. R. China.

### **Table of Contents**

#### **Section 1** Experimental Procedures

## **Section 2 Results and Discussion**

# Experimental Procedures

## Experimental details.

General methods and materials. The reagents were commercially purchased and used without further purification. Elemental analyses of Na, Mn, W were analyzed on were performed on a Perkin-Elmer Optima 2000 ICP-OES spectrometer. The IR spectra were obtained in KBr pellets with a Nicolet FT-IR 360 spectrometer over the range of 4000–400  $\text{cm}^{-1}$ . Magnetic susceptibility measurements were obtained by the use of a Quantum Design SQUID (MPMS-XL7) magnetometer (0.1 Tesla) at a temperature ranging from 1.8 to 300 K. Electrospray Ionization Mass Spectrometry (ESI-MS) was performed using a Triple TOF 4600-1 mass spectrometer. All samples were prepared as described in the following and injected directly at a flow rate of 5  $\mu\text{L min}^{-1}$  using a syringe pump. All spectra were collected in negative and positive mode and analyzed using the PeakView software.

STM sample preparation and characterization: All the solutions were prepared by dissolving the chemicals in heptanoic acid with the concentration less than  $10^{-4}$  M. A droplet of TCDB solution (0.1  $\mu\text{L}$ ) was first deposited onto the freshly cleaved highly oriented pyrolytic graphite (HOPG, grade ZYA, NTMDT, Russia) surface for STM characterization of the TCDB template network. Subsequently, a droplet of **1** solution (0.1  $\mu\text{L}$ ) was added to the surface for characterization of the host-guest structure. The samples were characterized at the liquid-solid interface using a Nanoscope IIIA system (Bruker, USA) under ambient conditions. The STM tips were mechanically cut from Pt/Ir (80/20) wires. All the images were captured in constant-current mode and specific tunneling conditions are noted in the figure captions.

All electrochemical experiments were conducted on a CH Instrument (660E) electrochemical station in a standard three electrode cell at room temperature. A glassy carbon electrode (diameter = 5mm), an Ag/AgCl (3.5 M KCl), and a Pt wire were used as the working electrode, reference and counter electrode, respectively. The cyclic voltammogram (CV) curve of compound **1** (1 mM) in distilled water (supporting electrolyte 0.1 M  $\text{Na}_2\text{SO}_4$ ) was tested in the range of -1 – +1.35V vs Ag/AgCl with a scan rate of 100  $\text{mV s}^{-1}$ .

Crystal data for  $\text{Na}_8\text{H}_{32}[\{\text{Mn}^{\text{IV}}_{24}\text{Mn}^{\text{III}}_{12}\text{O}_{28}(\text{H}_2\text{O})_{23}\}_2(\text{W}_{24}\text{O}_{120})_2]\cdot 66\text{H}_2\text{O}$  (**1a**): A reddish-black plate-like crystal of **1a** with dimensions 0.48 × 0.18 × 0.07  $\text{mm}^3$  was mounted on a Hampton cryo-loop for indexing and intensity data collection at 296 K on Bruker Apex-II CCD diffractometer with Mo  $K\alpha$  radiation ( $\lambda = 0.71073 \text{ \AA}$ ). Of the 64134 reflection collected ( $2\theta_{\text{max}} = 50.00$ , 99.4% complete), 43555 were unique ( $R_{\text{int}} = 0.0713$ ). Routine Lorentz polarization and empirical absorption correction were applied. The structure was solved by direct methods and refined by full-matrix least-squares methods on  $F^2$  with SHELXTL-2014 and olex2 program package. No hydrogen atoms could be located from the difference Fourier map. Further details on the crystal structure investigations may be obtained from <https://www.ccdc.cam.ac.uk/structures/> (CCDC No. 1574960).

## Preparation of sol.Mn:

Mn(CH<sub>3</sub>COO)<sub>2</sub>·4H<sub>2</sub>O (1.00 g, 4.08 mmol) was dissolved in 10 mL 60% (v/v) CH<sub>3</sub>COOH solution. After dissolution, KMnO<sub>4</sub> (0.25 g, 1.58 mmol) was added to the solution, and the mixture was vigorously stirred for one hour.

#### **Preparation of 1:**

In a 50 mL beaker, a sample of Na<sub>2</sub>WO<sub>4</sub>·2H<sub>2</sub>O (1.0 g) was dissolved in 30 mL H<sub>2</sub>O. The pH of the solution was then adjusted to about 5.5 with **sol.Mn**. Then the dark orange/brown mixture was heated to 90 °C for 1 hour, cooled to room temperature and then filtered. The colorless, block-shaped crystals of para-dodecatungstate ([H<sub>2</sub>W<sub>12</sub>O<sub>42</sub>]<sup>10-</sup>, which appeared the following day, were filtered off. In the filtrate reddish-black, plate-like crystals formed after approximately one week. The orange crystals of Na<sub>8</sub>MnW<sub>6</sub>O<sub>24</sub>·xH<sub>2</sub>O appeared before the mother liquid dried up.

Typically yields of **1**: ca. 6 % based on Mn. IR (KBr pellet, *ν*/cm<sup>-1</sup>): 3424 (br/m), 1629 (m), 943 (w), 826 (m), 682 (s). Elemental analysis (%) for **1**, calcd: Na: 0.94, Mn: 20.27, W: 45.22; found: Na: 0.89, Mn: 20.35, W: 45.34.

## Results and Discussion

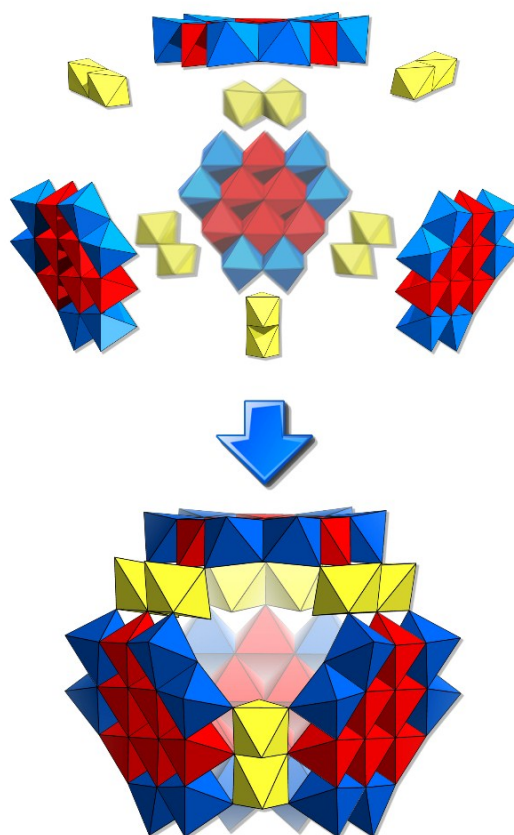

**Fig. S1.** Scheme showing the key building blocks of the  $\text{Mn}_{36}\text{W}_{24}$  cage in **1**: four planar  $\text{Mn}_6$  fragments, twelve  $\text{W}_2$  groups, and six  $\text{Mn}_2$  groups. The cage-like moiety  $\text{Mn}_{36}\text{W}_{24}$  could hence be regarded as being composed of four planar  $\{\text{Mn}^{\text{IV}}_6\text{W}_6\}$  fragments connected by six  $\text{Mn}_2$  linkers. Color code of the  $\text{MO}_6$  octahedra:  $\text{Mn}^{\text{IV}}$ : red;  $\text{Mn}^{\text{III}}$ : yellow; W: blue.

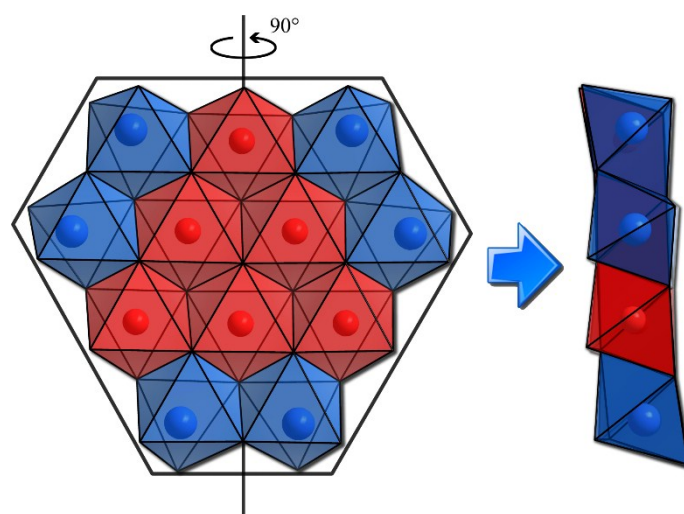

**Fig. S2.** Three  $\text{W}_2$  units attached to a triangular  $\text{Mn}_6$  unit, leading to a larger, planar building block, forming the sides of the  $\text{Mn}_{36}\text{W}_{24}$  cage. Color code of the  $\text{MO}_6$  octahedra:  $\text{Mn}^{\text{IV}}$ : red; W: blue.

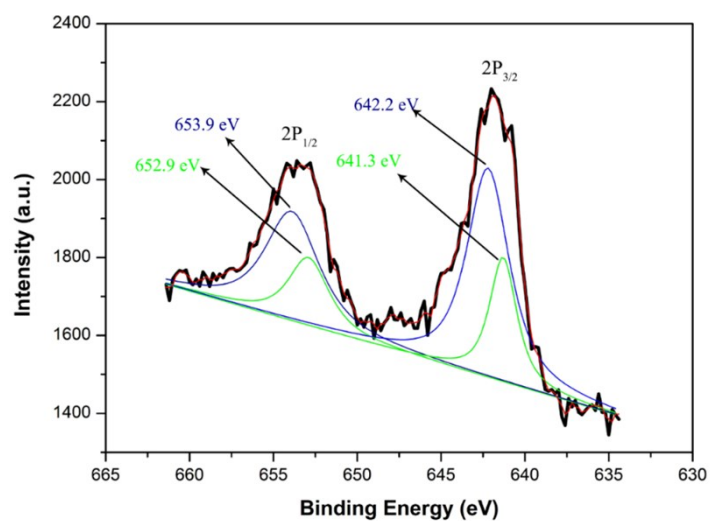

Fig. S3. XPS spectrum of **1** showing Mn  $2P_{1/2}$  and  $2P_{3/2}$ .

|      | BVS value   |              |             |              |
|------|-------------|--------------|-------------|--------------|
|      | Mn(II)<br>) | Mn(III)<br>) | Mn(IV)<br>) | Mn(VII)<br>) |
| Mn1  | 4.61        | 4.25         | 4.17        | 4.61         |
| Mn2  | 4.42        | 4.07         | 4.00        | 4.42         |
| Mn3  | 4.41        | 4.07         | 3.99        | 4.41         |
| Mn4  | 4.42        | 4.08         | 4.00        | 4.42         |
| Mn5  | 4.27        | 3.94         | 3.87        | 4.27         |
| Mn6  | 4.49        | 4.14         | 4.06        | 4.49         |
| Mn7  | 4.35        | 4.01         | 3.93        | 4.35         |
| Mn8  | 4.49        | 4.14         | 4.06        | 4.49         |
| Mn9  | 4.60        | 4.24         | 4.16        | 4.60         |
| Mn10 | 4.29        | 3.95         | 3.88        | 4.29         |
| Mn11 | 4.39        | 4.04         | 3.97        | 4.39         |
| Mn12 | 4.45        | 4.10         | 4.02        | 4.45         |
| Mn13 | 4.45        | 4.11         | 4.03        | 4.45         |
| Mn14 | 4.41        | 4.07         | 3.99        | 4.41         |
| Mn15 | 4.42        | 4.08         | 4.00        | 4.42         |
| Mn16 | 4.49        | 4.14         | 4.06        | 4.49         |
| Mn17 | 4.43        | 4.08         | 4.01        | 4.43         |
| Mn18 | 4.55        | 4.19         | 4.12        | 4.55         |
| Mn19 | 4.41        | 4.06         | 3.99        | 4.41         |
| Mn20 | 4.35        | 4.01         | 3.94        | 4.35         |
| Mn21 | 4.40        | 4.06         | 3.98        | 4.40         |
| Mn22 | 4.45        | 4.10         | 4.03        | 4.45         |
| Mn23 | 4.27        | 3.93         | 3.86        | 4.27         |
| Mn24 | 4.60        | 4.24         | 4.16        | 4.60         |
| Mn25 | 3.32        | 3.06         | 3.00        | 3.32         |
| Mn26 | 3.30        | 3.04         | 2.98        | 3.30         |
| Mn27 | 3.35        | 3.08         | 3.03        | 3.35         |

**Fig. S4 / Table S1.** Bond valence sum (BVS) values (calculated according to N. E. Brese, M. O'Keeffe, *Acta Crystallogr. Sect. B* **1991**, 47, 192) for the Mn centers in **1**.

The

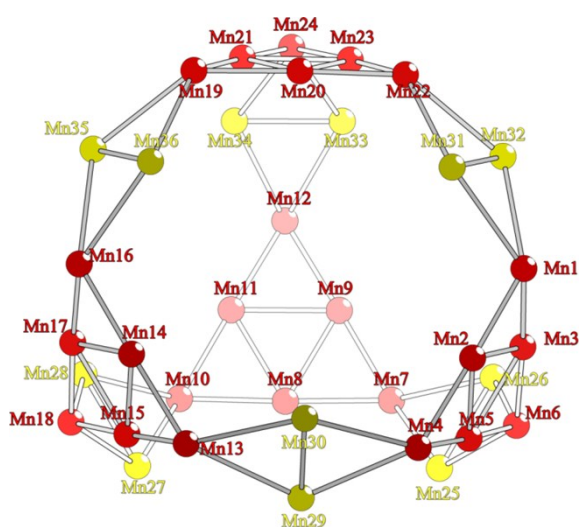

|                  |      |             |      |      |
|------------------|------|-------------|------|------|
| Mn2              | 3.28 | <b>3.02</b> | 2.97 | 3.28 |
| Mn2              | 3.31 | <b>3.05</b> | 3.00 | 3.31 |
| Mn3              | 3.16 | <b>2.92</b> | 2.86 | 3.16 |
| Mn3 <sub>1</sub> | 3.31 | <b>3.05</b> | 2.99 | 3.31 |
| Mn3 <sub>2</sub> | 3.36 | <b>3.10</b> | 3.04 | 3.36 |
| Mn3 <sub>3</sub> | 3.24 | <b>2.98</b> | 2.93 | 3.24 |
| Mn3 <sub>4</sub> | 3.27 | <b>3.01</b> | 2.96 | 3.27 |
| Mn3 <sub>5</sub> | 3.32 | <b>3.06</b> | 3.00 | 3.32 |
| Mn3 <sub>6</sub> | 3.31 | <b>3.06</b> | 3.00 | 3.31 |

assigned oxidation states are highlighted in bold with a colored background (red: Mn<sup>IV</sup>, yellow: Mn<sup>III</sup>).

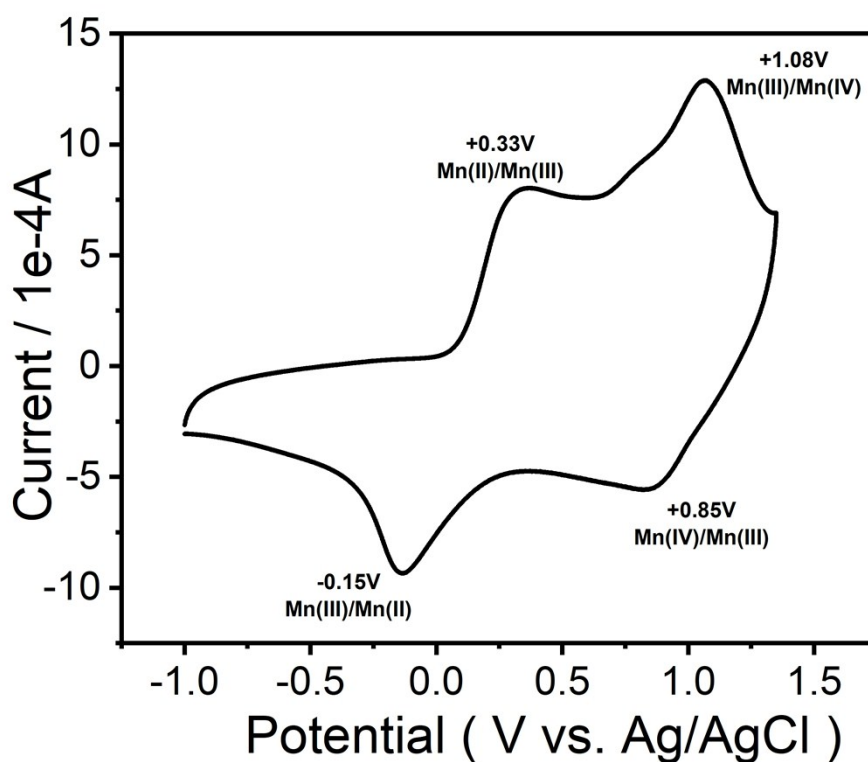

**Fig. S5** Cyclic voltammogram of 1 mM  $\text{Mn}_{72}\text{W}_{48}$  (used supporting electrolyte 0.1 M  $\text{Na}_2\text{SO}_4$ ), scan rate was 100 mV/s



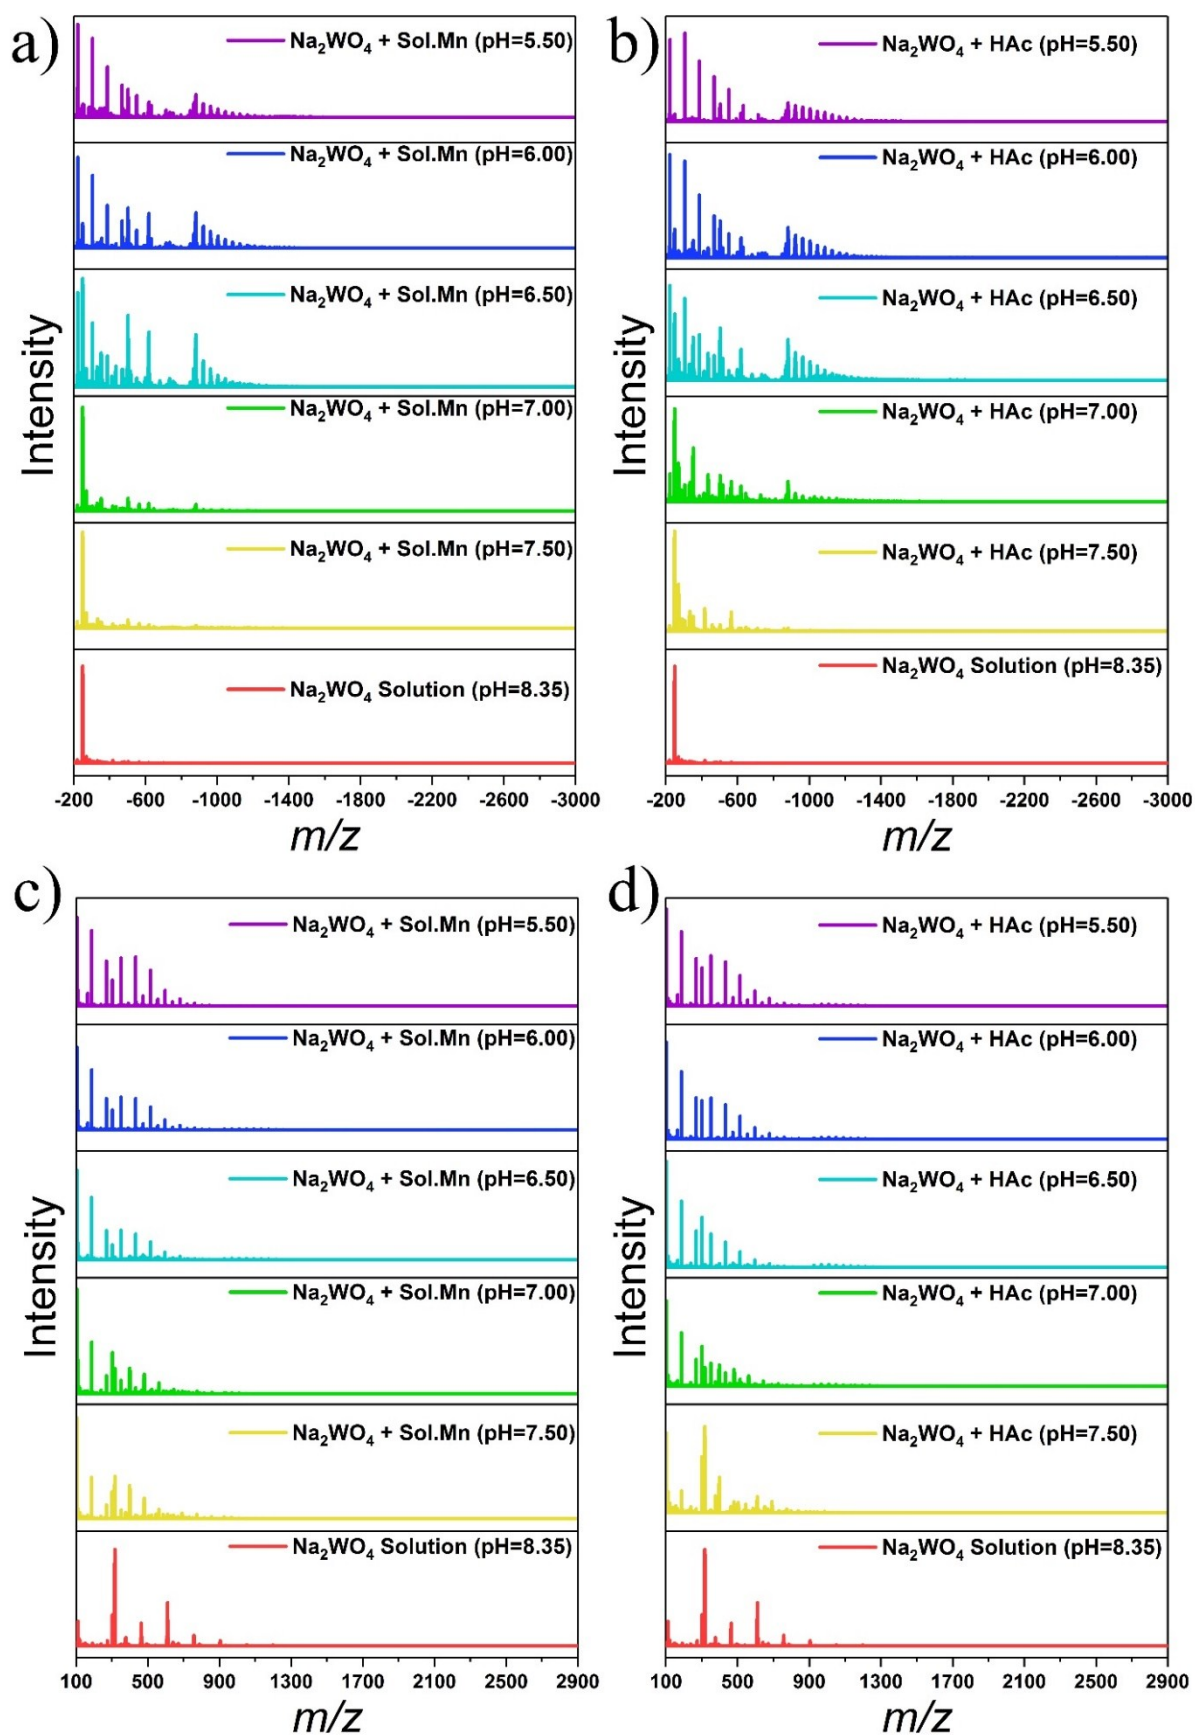

**Fig. S6** Negative and positive mode of ESI-MS spectra of **sol.W-Mn** (a, c) and **sol.W-HAc** (b, d).

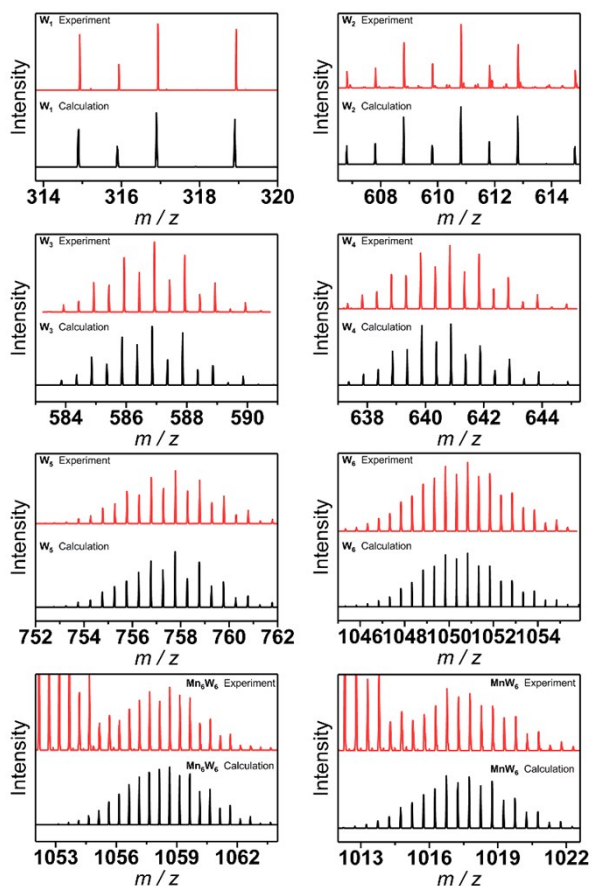

**Fig. S7** Selected experimental (red) and simulated (black) mass spectra of the isotopic envelopes for **sol.W-Mn** in positive mode.

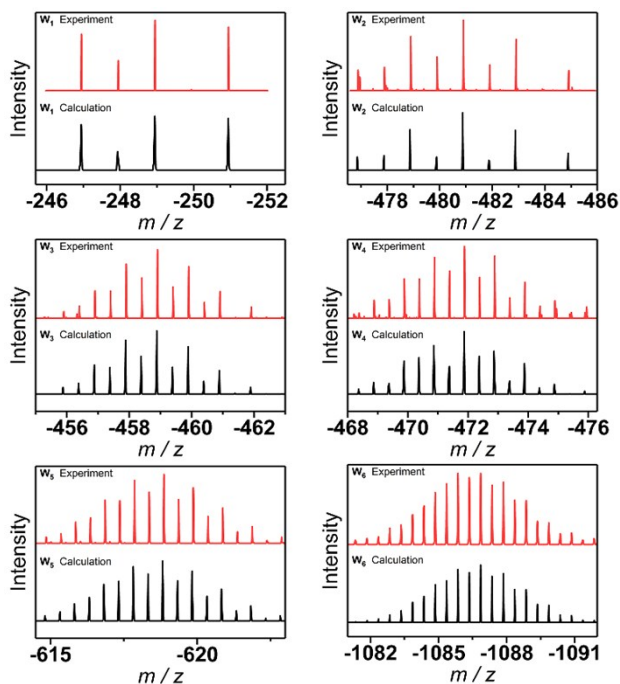

**Fig. S8** Selected experimental (red) and simulated (black) mass spectra of the isotopic envelopes for **sol.W-Mn** in negative mode.

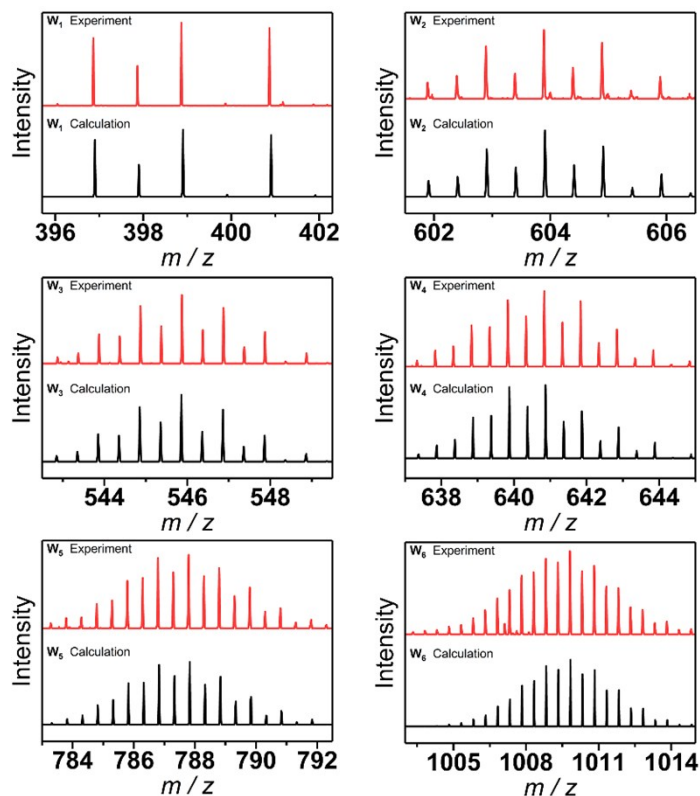

**Fig. S9** Selected experimental (red) and simulated (black) mass spectra of the isotopic envelopes for **sol.W-HAc** in positive mode.

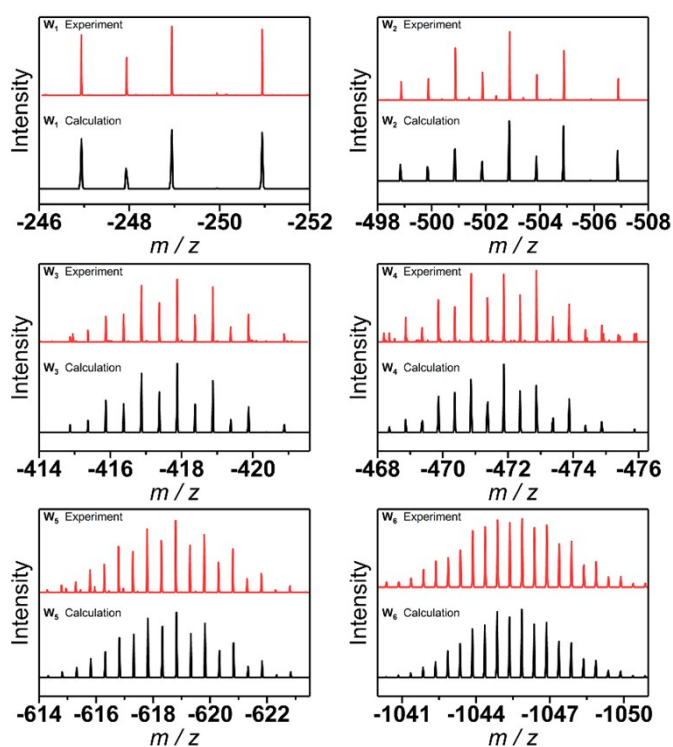

**Fig. S10** Selected experimental (red) and simulated (black) mass spectra of the isotopic envelopes for **sol.W-HAc** in negative mode.

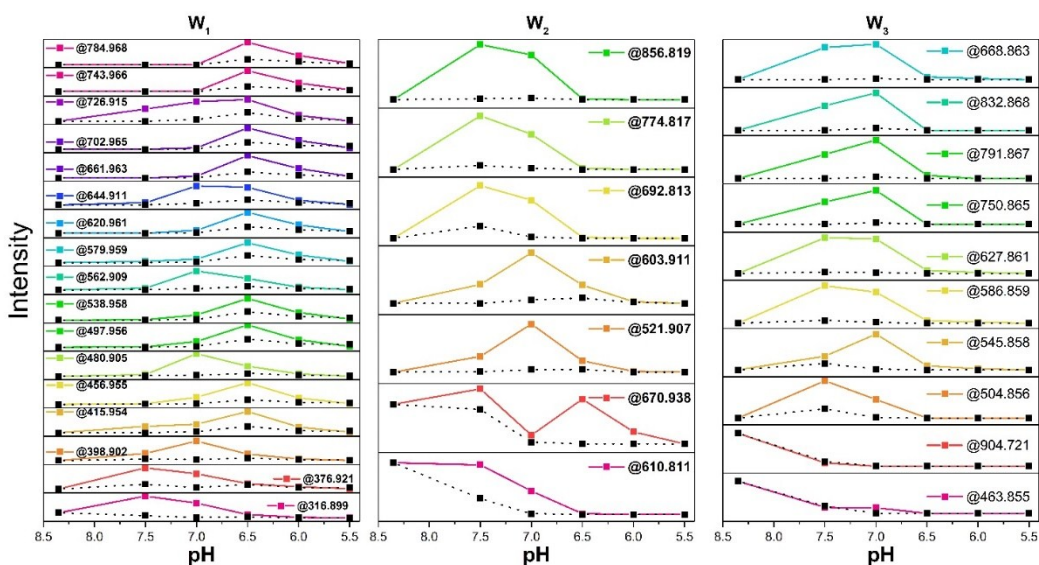

**Fig. S11** Positive mode of ESI-MS spectral intensity-pH profiles of  $W_1$ ,  $W_2$  and  $W_3$  species during the synthesis process in **sol.W-Mn**. The black dot lines represent corresponding intensities of the species in **sol.W-HAc**.

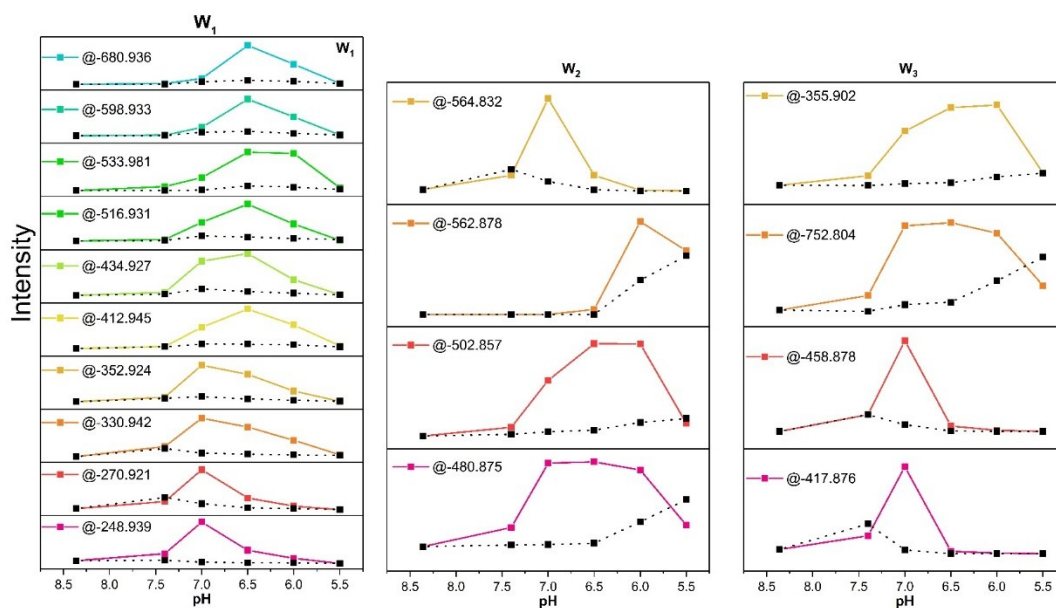

**Fig. S12** Negative mode of ESI-MS spectral intensity-pH profiles of  $W_1$ ,  $W_2$  and  $W_3$  species during the synthesis process in **sol.W-Mn**. The black dot lines represent corresponding intensities of the species in **sol.W-HAc**.

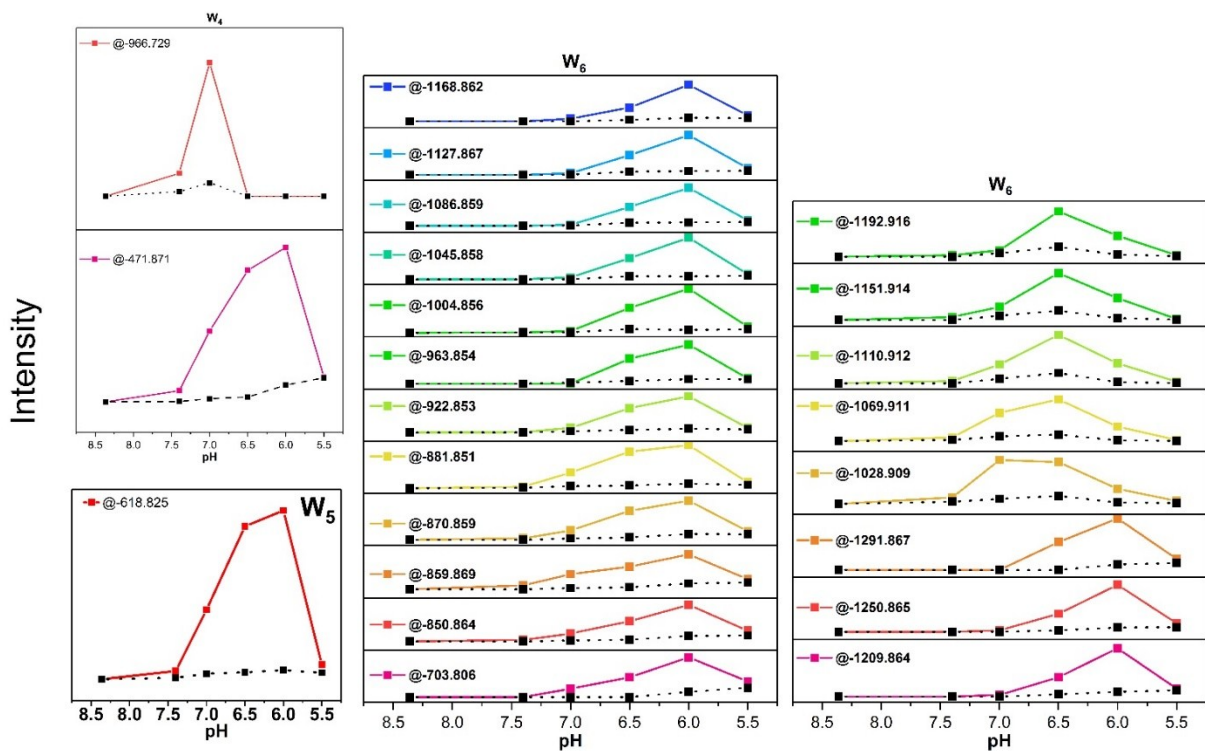

**Fig. S13** Negative mode of ESI-MS spectral intensity-pH profiles of  $W_4$ ,  $W_5$  and  $W_6$  species during the synthesis process in **sol.W-Mn**. The black dot lines represent corresponding intensities of the species in **sol.W-HAc**.

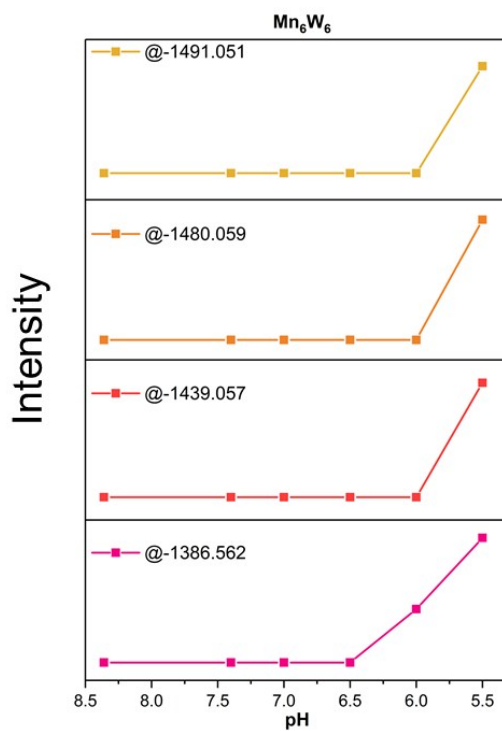

**Fig. S14** Negative mode of ESI-MS spectral intensity-pH profiles of  $Mn_6W_6$  species during the synthesis process in **sol.W-Mn**.



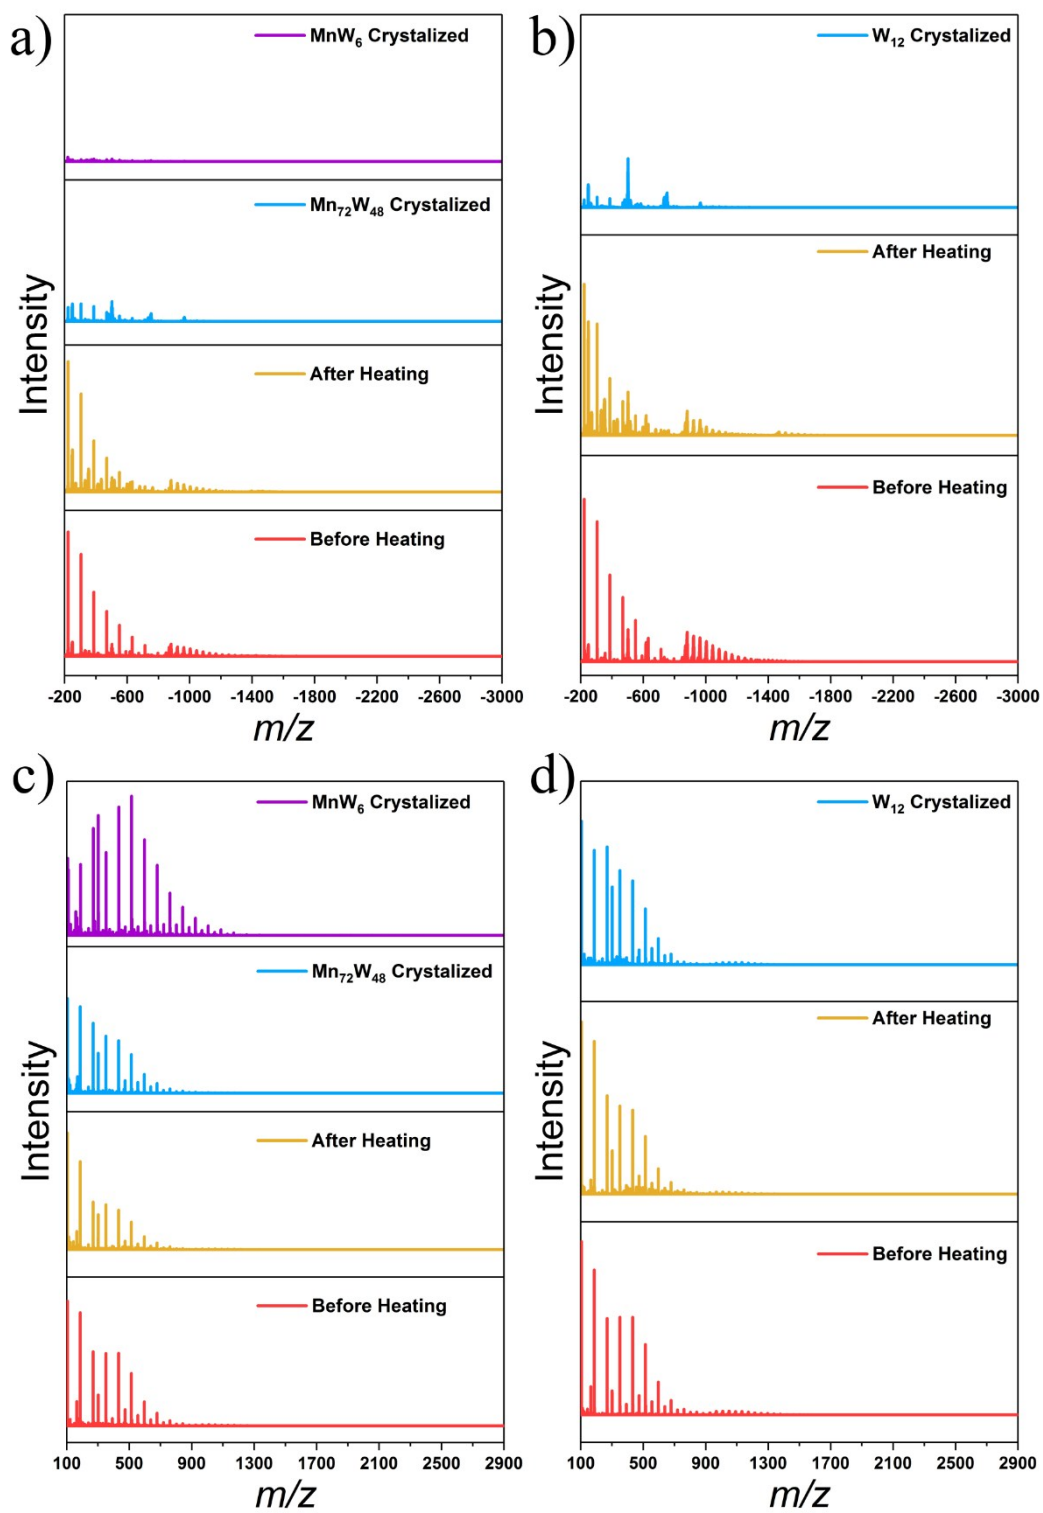

**Fig. S15** Negative and positive mode of ESI-MS spectra of **sol.W-Mn** (a, c) and **sol.W-HAc** (b, d) in the course of crystallization.

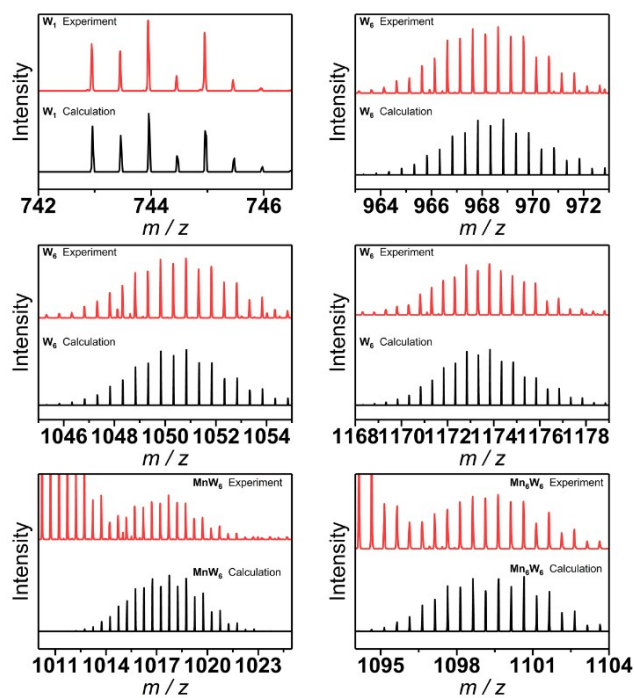

**Fig. S16** Selected experimental (red) and simulated (black) positive mode mass spectra of the isotopic envelopes for **sol.W-Mn** in course of crystallization.

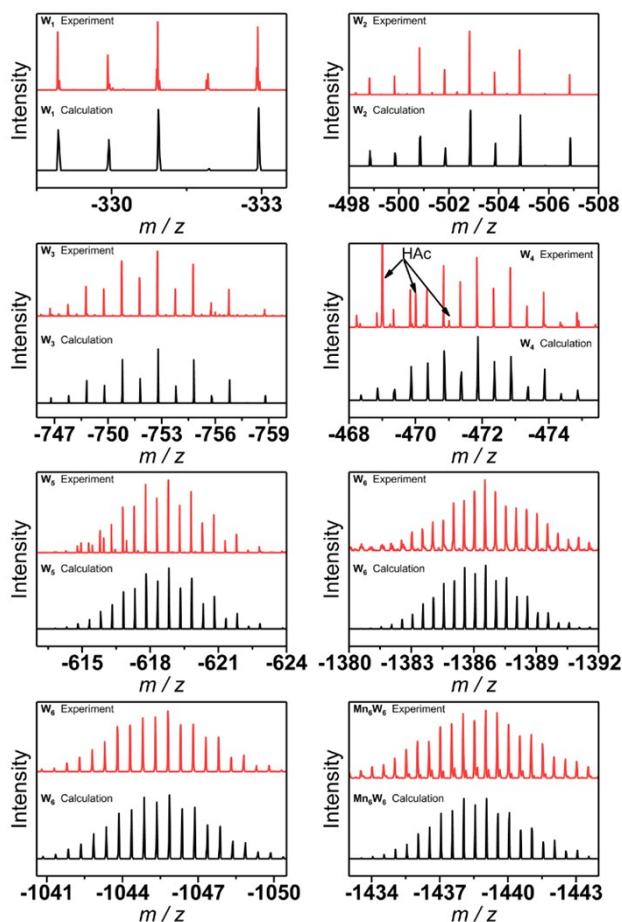

**Fig. S17** Selected experimental (red) and simulated (black) negative mode mass spectra of the isotopic envelopes for **sol.W-Mn** in course of crystallization.

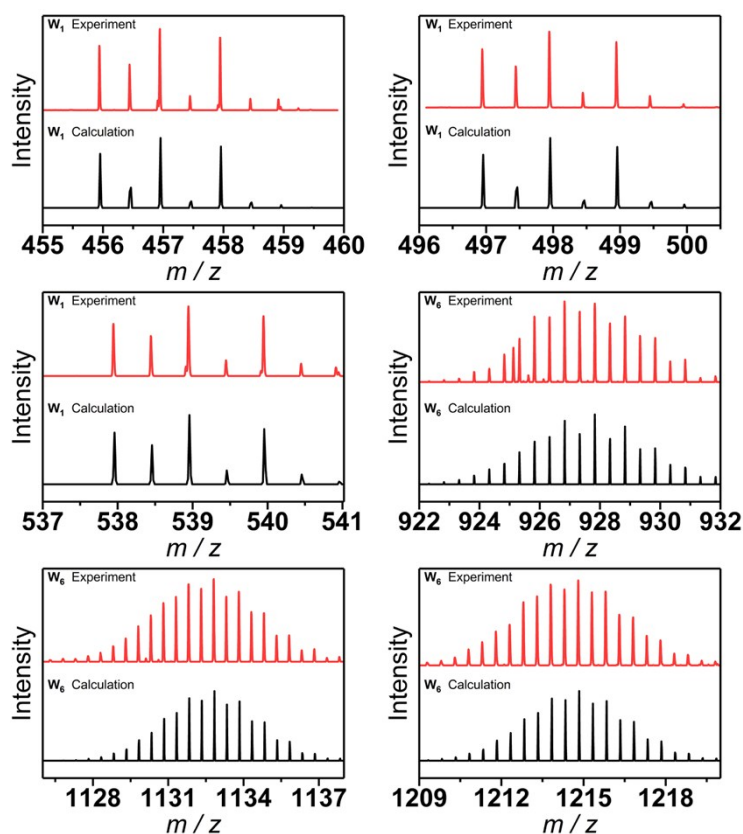

**Fig. S18** Selected experimental (red) and simulated (black) positive mode mass spectra of the isotopic envelopes for **sol.W-HAc** in course of crystallization.

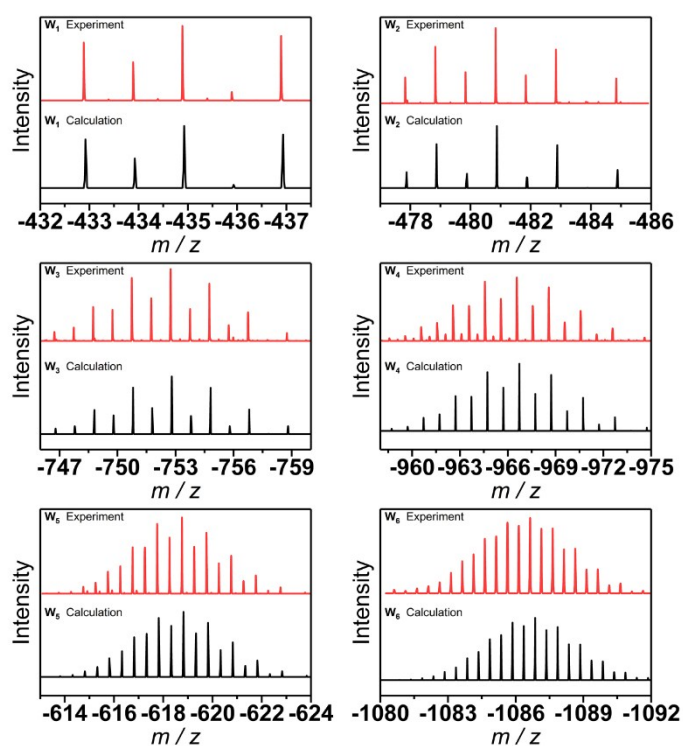

**Fig. S19** Selected experimental (red) and simulated (black) negative mode mass spectra of the isotopic envelopes for **sol.W-HAc** in course of crystallization.



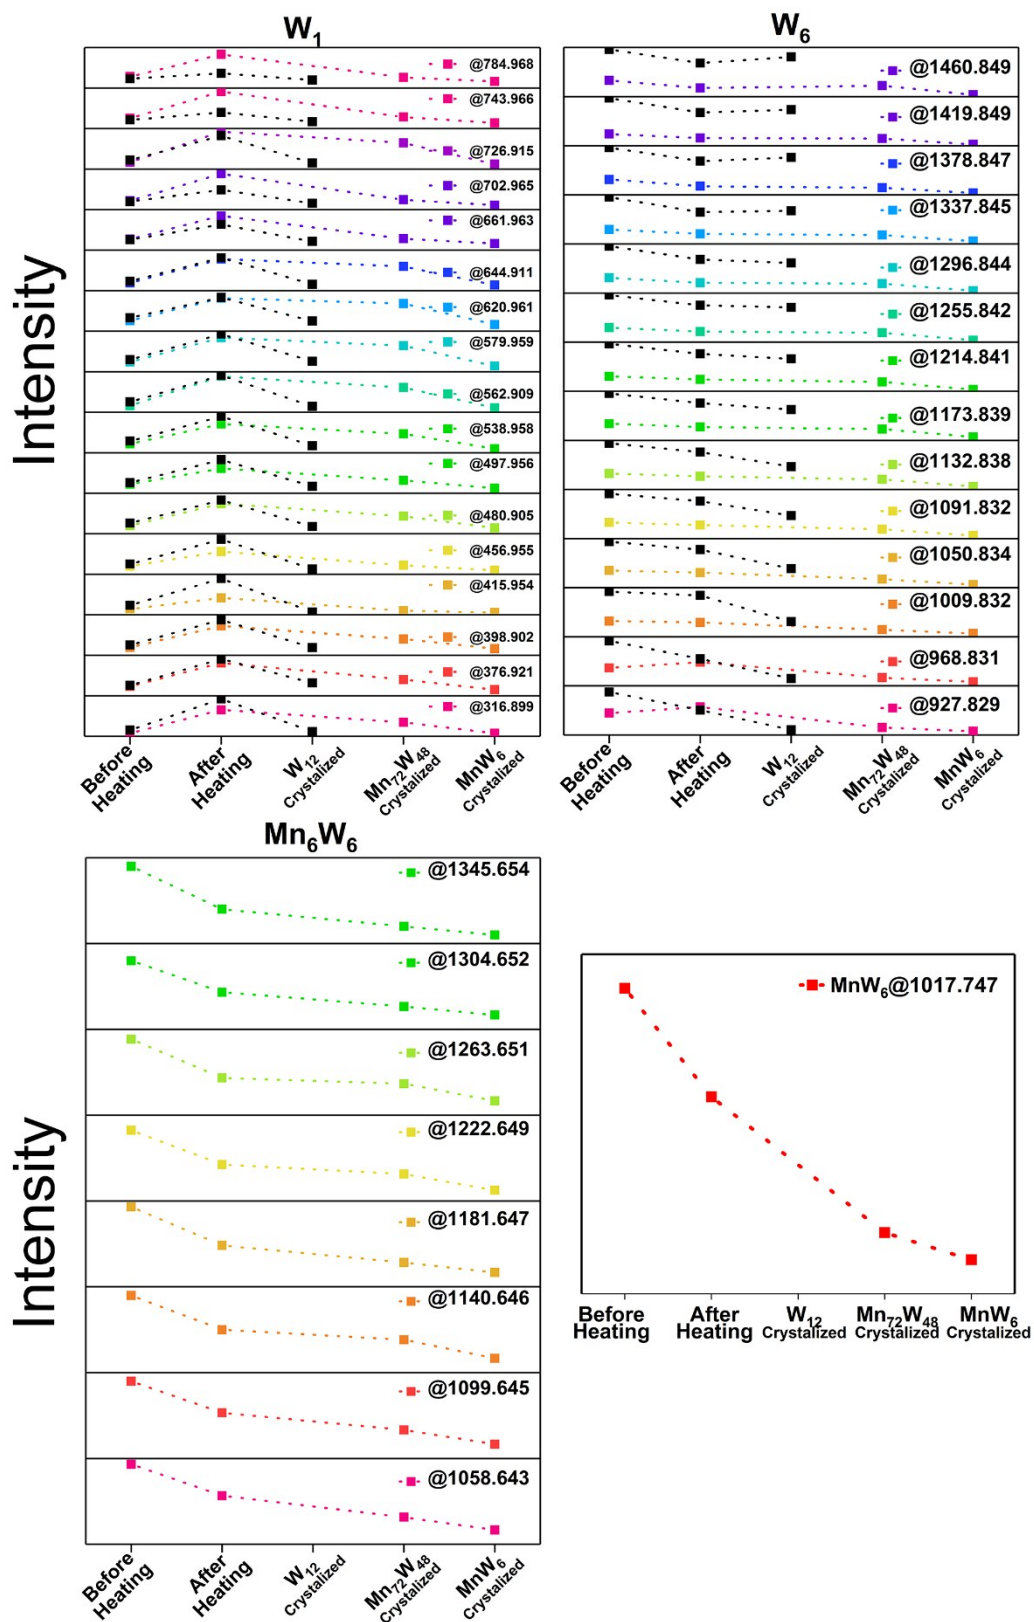

Fig. S20 Positive mode of ESI-MS spectral intensity-time profiles of  $W_1$ ,  $W_6$ ,  $Mn_6W_6$  and  $MnW_6$  species during the crystallization process in **sol.W-Mn**. The black dot lines represent corresponding intensities of the species in **sol.W-HAc** in course of crystallization.

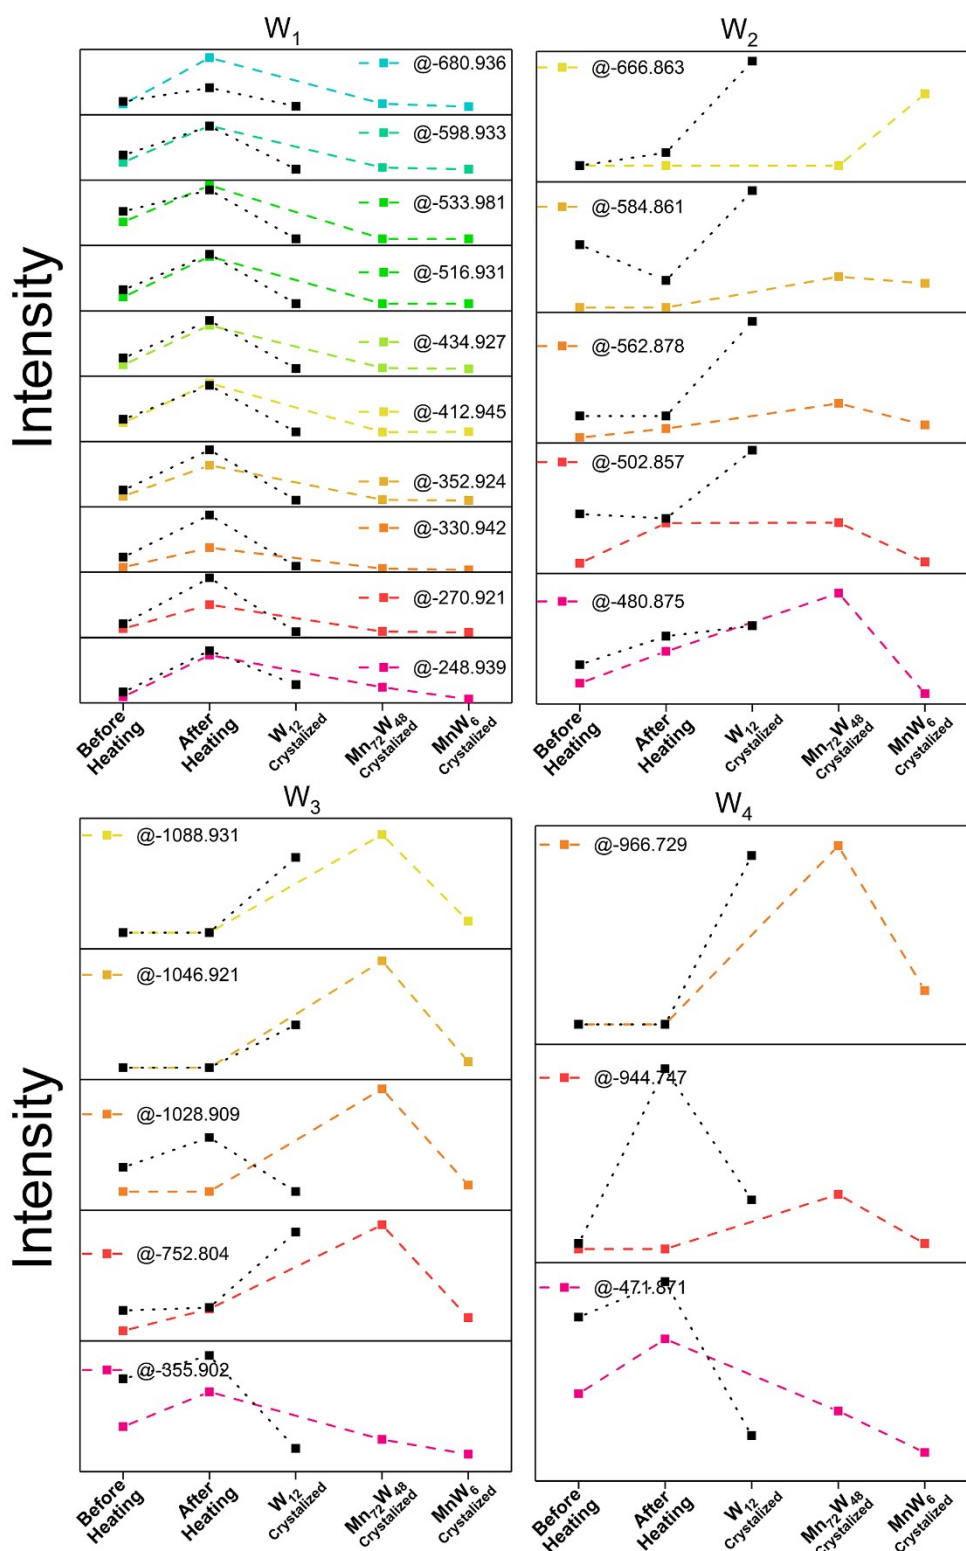

**Fig. S21** Negative mode of ESI-MS spectral intensity-time profiles of  $W_1$ ,  $W_2$ ,  $W_3$  and  $W_4$  species during the crystallization process in **sol.W-Mn**. The black dot lines represent corresponding intensities of the species in **sol.W-HAc** in course of crystallization.

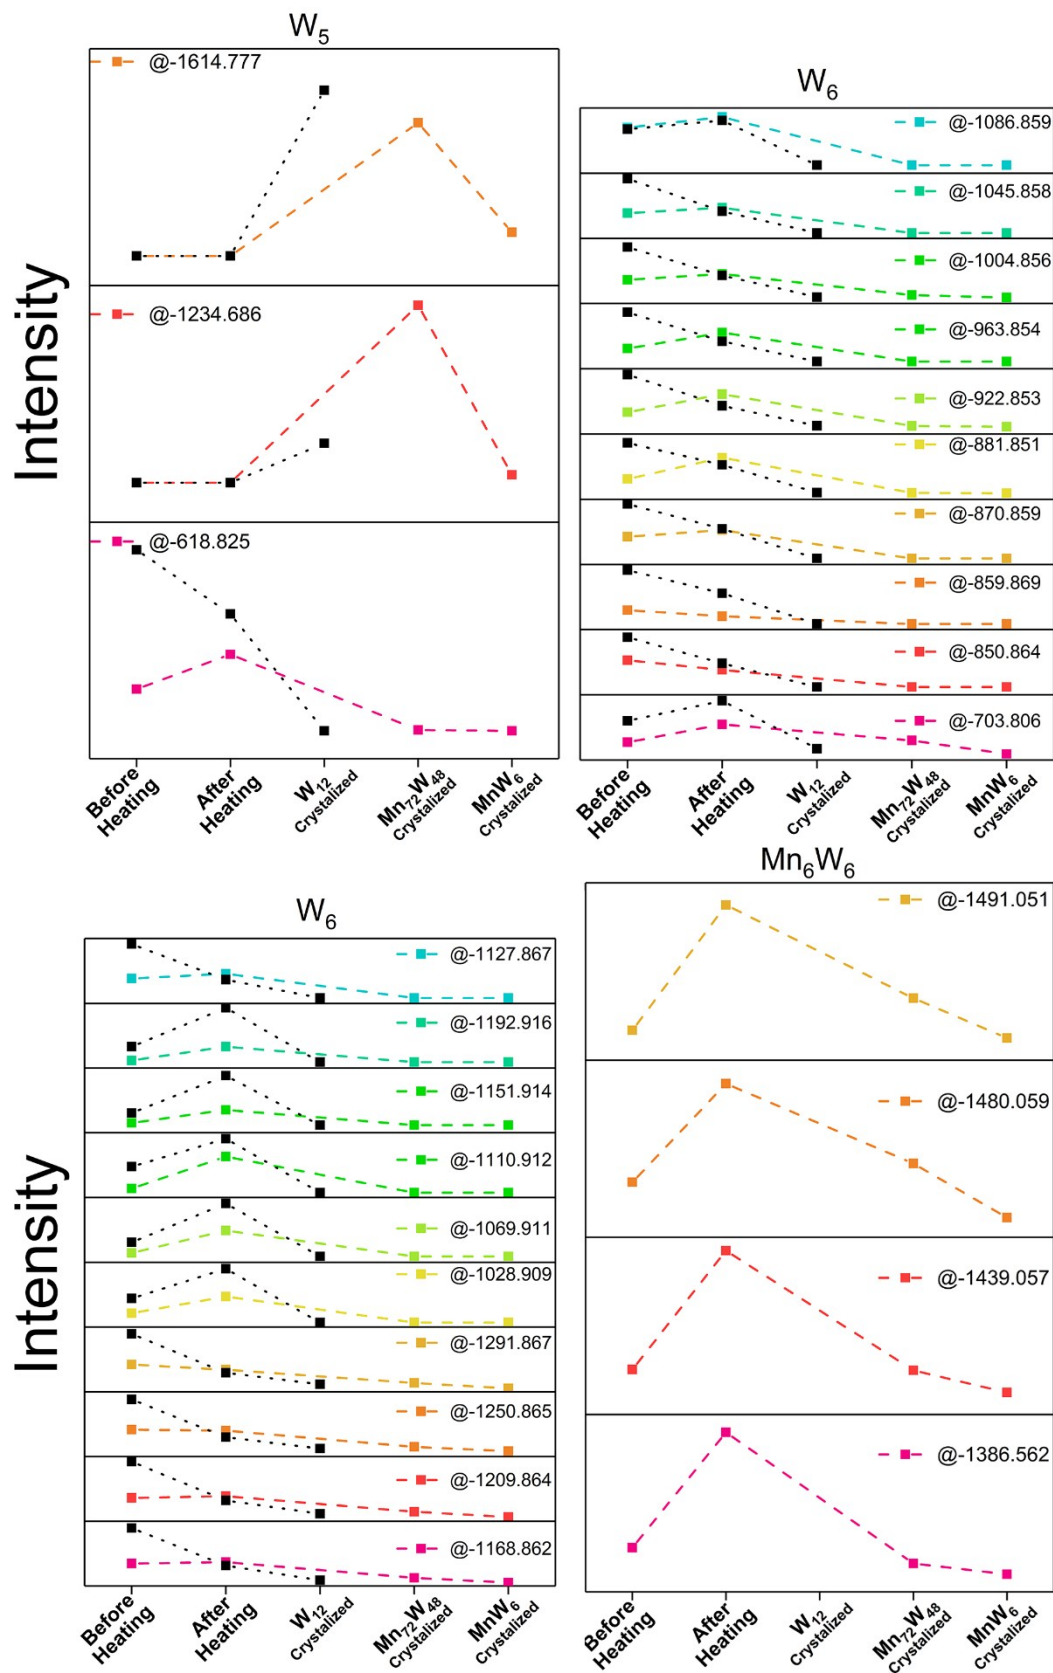

Fig. S22 Negative mode of ESI-MS spectral intensity-time profiles of  $W_5$ ,  $W_6$  and  $Mn_6W_6$  species during the crystallization process in **sol.W-Mn**. The black dot lines represent corresponding intensities of the species in **sol.W-HAc** in course of crystallization.

**Table S2** Assignment of the key species identified in **sol.W-Mn** in positive mode of ESI-MS tests. (Both calculated and experimental m/z values refer to the most intense peak in the isotopic envelope)

| Species              | Entry | Identification                                                                                            | Cal. m/z | Exp. m/z |
|----------------------|-------|-----------------------------------------------------------------------------------------------------------|----------|----------|
| <b>W<sub>1</sub></b> | 1     | Na <sub>3</sub> WO <sub>4</sub> <sup>+</sup>                                                              | 316.899  | 316.905  |
|                      | 2     | Na <sub>3</sub> WO <sub>4</sub> (HAc) <sup>+</sup>                                                        | 376.921  | 376.889  |
|                      | 3     | Na <sub>3</sub> WO <sub>4</sub> (NaAc) <sup>+</sup>                                                       | 398.902  | 398.927  |
|                      | 4     | Na <sub>4</sub> WO <sub>4</sub> (NaAc) <sub>6</sub> <sup>2+</sup>                                         | 415.954  | 415.987  |
|                      | 5     | Na <sub>4</sub> WO <sub>4</sub> (NaAc) <sub>7</sub> <sup>2+</sup>                                         | 456.955  | 456.987  |
|                      | 6     | Na <sub>3</sub> WO <sub>4</sub> (NaAc) <sub>2</sub> <sup>+</sup>                                          | 480.905  | 480.932  |
|                      | 7     | Na <sub>4</sub> WO <sub>4</sub> (NaAc) <sub>8</sub> <sup>2+</sup>                                         | 497.956  | 497.981  |
|                      | 8     | Na <sub>4</sub> WO <sub>4</sub> (NaAc) <sub>9</sub> <sup>2+</sup>                                         | 538.958  | 538.987  |
|                      | 9     | Na <sub>3</sub> WO <sub>4</sub> (NaAc) <sub>3</sub> <sup>+</sup>                                          | 562.909  | 562.938  |
|                      | 10    | Na <sub>4</sub> WO <sub>4</sub> (NaAc) <sub>10</sub> <sup>2+</sup>                                        | 579.959  | 579.967  |
|                      | 11    | Na <sub>4</sub> WO <sub>4</sub> (NaAc) <sub>11</sub> <sup>2+</sup>                                        | 620.961  | 621.001  |
|                      | 12    | Na <sub>3</sub> WO <sub>4</sub> (NaAc) <sub>4</sub> <sup>+</sup>                                          | 644.911  | 644.942  |
|                      | 13    | Na <sub>4</sub> WO <sub>4</sub> (NaAc) <sub>12</sub> <sup>2+</sup>                                        | 661.963  | 661.999  |
|                      | 14    | Na <sub>4</sub> WO <sub>4</sub> (NaAc) <sub>13</sub> <sup>2+</sup>                                        | 702.965  | 702.991  |
|                      | 15    | Na <sub>3</sub> WO <sub>4</sub> (NaAc) <sub>5</sub> <sup>+</sup>                                          | 726.915  | 726.967  |
|                      | 16    | Na <sub>4</sub> WO <sub>4</sub> (NaAc) <sub>14</sub> <sup>2+</sup>                                        | 743.966  | 743.997  |
|                      | 17    | Na <sub>4</sub> WO <sub>4</sub> (NaAc) <sub>15</sub> <sup>2+</sup>                                        | 784.968  | 785.002  |
| <b>W<sub>2</sub></b> | 18    | Na <sub>5</sub> W <sub>2</sub> O <sub>8</sub> <sup>+</sup>                                                | 610.811  | 610.823  |
|                      | 19    | Na <sub>2</sub> H <sub>3</sub> W <sub>2</sub> O <sub>8</sub> (H <sub>2</sub> O) <sub>7</sub> <sup>+</sup> | 670.938  | 670.892  |
|                      | 20    | Na <sub>6</sub> W <sub>2</sub> O <sub>8</sub> (NaAc) <sub>5</sub> <sup>2+</sup>                           | 521.907  | 521.956  |
|                      | 21    | Na <sub>6</sub> W <sub>2</sub> O <sub>8</sub> (NaAc) <sub>7</sub> <sup>2+</sup>                           | 603.911  | 603.955  |
|                      | 22    | Na <sub>5</sub> W <sub>2</sub> O <sub>8</sub> (NaAc) <sup>+</sup>                                         | 692.813  | 692.852  |
|                      | 23    | Na <sub>5</sub> W <sub>2</sub> O <sub>8</sub> (NaAc) <sub>2</sub> <sup>+</sup>                            | 774.817  | 774.849  |
|                      | 24    | Na <sub>5</sub> W <sub>2</sub> O <sub>8</sub> (NaAc) <sub>3</sub> <sup>+</sup>                            | 856.819  | 856.853  |
| <b>W<sub>3</sub></b> | 25    | Na <sub>8</sub> W <sub>3</sub> O <sub>12</sub> <sup>2+</sup>                                              | 463.855  | 463.864  |
|                      | 26    | Na <sub>7</sub> W <sub>3</sub> O <sub>12</sub> <sup>+</sup>                                               | 904.721  | 904.741  |
|                      | 27    | Na <sub>8</sub> W <sub>3</sub> O <sub>12</sub> (NaAc) <sub>2</sub> <sup>2+</sup>                          | 504.856  | 504.881  |
|                      | 28    | Na <sub>8</sub> W <sub>3</sub> O <sub>12</sub> (NaAc) <sub>2</sub> <sup>2+</sup>                          | 545.858  | 545.879  |
|                      | 29    | Na <sub>8</sub> W <sub>3</sub> O <sub>12</sub> (NaAc) <sub>3</sub> <sup>2+</sup>                          | 586.859  | 586.883  |
|                      | 30    | Na <sub>8</sub> W <sub>3</sub> O <sub>12</sub> (NaAc) <sub>4</sub> <sup>2+</sup>                          | 627.861  | 627.889  |
|                      | 31    | Na <sub>8</sub> W <sub>3</sub> O <sub>12</sub> (NaAc) <sub>7</sub> <sup>2+</sup>                          | 750.865  | 750.901  |
|                      | 32    | Na <sub>8</sub> W <sub>3</sub> O <sub>12</sub> (NaAc) <sub>8</sub> <sup>2+</sup>                          | 791.867  | 791.897  |
|                      | 33    | Na <sub>8</sub> W <sub>3</sub> O <sub>12</sub> (NaAc) <sub>9</sub> <sup>2+</sup>                          | 832.868  | 832.893  |

| Species                            | Entry                                                                     | Identification                                                                                | Cal. m/z     | Exp. m/z     |
|------------------------------------|---------------------------------------------------------------------------|-----------------------------------------------------------------------------------------------|--------------|--------------|
|                                    | 34                                                                        | $\text{Na}_8\text{W}_3\text{O}_{12}(\text{NaAc})_5^{2+}$                                      | 668.863      | 668.892      |
| <b>W<sub>4</sub></b>               | 35                                                                        | $\text{Na}_7\text{H}_3\text{W}_4\text{O}_{16}(\text{H}_2\text{O})_7^{2+}$                     | 640.874      | 640.835      |
| <b>W<sub>5</sub></b>               | 36                                                                        | $\text{Na}_{12}\text{W}_5\text{O}_{20}^{2+}$                                                  | 757.765      | 757.782      |
|                                    | 37                                                                        | $\text{Na}_9\text{H}_3\text{W}_5\text{O}_{20}(\text{H}_2\text{O})_7^{2+}$                     | 787.829      | 787.794      |
| <b>W<sub>6</sub></b>               | 38                                                                        | $\text{Na}_2\text{H}_2\text{W}_6\text{O}_{19}(\text{NaAc})_4(\text{H}_2\text{O})_4^{2+}$      | 927.829      | 927.838      |
|                                    | 39                                                                        | $\text{Na}_2\text{H}_2\text{W}_6\text{O}_{19}(\text{NaAc})_5(\text{H}_2\text{O})_4^{2+}$      | 968.831      | 968.844      |
|                                    | 40                                                                        | $\text{Na}_2\text{H}_2\text{W}_6\text{O}_{19}(\text{NaAc})_6(\text{H}_2\text{O})_4^{2+}$      | 1009.83<br>2 | 1009.85<br>5 |
|                                    | 41                                                                        | $\text{Na}_2\text{H}_2\text{W}_6\text{O}_{19}(\text{NaAc})_7(\text{H}_2\text{O})_4^{2+}$      | 1050.83<br>5 | 1050.85<br>8 |
|                                    | 42                                                                        | $\text{Na}_2\text{H}_2\text{W}_6\text{O}_{19}(\text{NaAc})_8(\text{H}_2\text{O})_4^{2+}$      | 1091.832     | 1091.867     |
|                                    | 43                                                                        | $\text{Na}_2\text{H}_2\text{W}_6\text{O}_{19}(\text{NaAc})_9(\text{H}_2\text{O})_4^{2+}$      | 1132.838     | 1132.865     |
|                                    | 44                                                                        | $\text{Na}_2\text{H}_2\text{W}_6\text{O}_{19}(\text{NaAc})_{10}(\text{H}_2\text{O})_4^{2+}$   | 1173.839     | 1173.871     |
|                                    | 45                                                                        | $\text{Na}_2\text{H}_2\text{W}_6\text{O}_{19}(\text{NaAc})_{11}(\text{H}_2\text{O})_4^{2+}$   | 1214.841     | 1214.869     |
|                                    | 46                                                                        | $\text{Na}_2\text{H}_2\text{W}_6\text{O}_{19}(\text{NaAc})_{12}(\text{H}_2\text{O})_4^{2+}$   | 1255.84<br>2 | 1255.863     |
|                                    | 47                                                                        | $\text{Na}_2\text{H}_2\text{W}_6\text{O}_{19}(\text{NaAc})_{13}(\text{H}_2\text{O})_4^{2+}$   | 1296.84<br>4 | 1296.877     |
|                                    | 48                                                                        | $\text{Na}_2\text{H}_2\text{W}_6\text{O}_{19}(\text{NaAc})_{14}(\text{H}_2\text{O})_4^{2+}$   | 1337.845     | 1337.874     |
|                                    | 49                                                                        | $\text{Na}_2\text{H}_2\text{W}_6\text{O}_{19}(\text{NaAc})_{15}(\text{H}_2\text{O})_4^{2+}$   | 1378.84<br>7 | 1378.873     |
|                                    | 50                                                                        | $\text{Na}_2\text{H}_2\text{W}_6\text{O}_{19}(\text{NaAc})_{16}(\text{H}_2\text{O})_4^{2+}$   | 1419.84<br>9 | 1419.879     |
|                                    | 51                                                                        | $\text{Na}_2\text{H}_2\text{W}_6\text{O}_{19}(\text{NaAc})_{17}(\text{H}_2\text{O})_4^{2+}$   | 1460.84<br>9 | 1460.881     |
|                                    | 52                                                                        | $\text{Na}_4\text{W}_6\text{O}_{19}(\text{NaAc})_7(\text{HAc})_4^{2+}$                        | 1156.838     | 1156.826     |
|                                    | 53                                                                        | $\text{Na}_4\text{W}_6\text{O}_{19}(\text{NaAc})_8(\text{HAc})_4^{2+}$                        | 1197.839     | 1197.831     |
|                                    | 54                                                                        | $\text{Na}_4\text{W}_6\text{O}_{19}(\text{NaAc})_9(\text{HAc})_4^{2+}$                        | 1238.841     | 1238.84<br>9 |
| 55                                 | $\text{Na}_4\text{W}_6\text{O}_{19}(\text{NaAc})_{10}(\text{HAc})_4^{2+}$ | 1279.84<br>2                                                                                  | 1279.851     |              |
| 56                                 | $\text{Na}_4\text{W}_6\text{O}_{19}(\text{NaAc})_{11}(\text{HAc})_4^{2+}$ | 1320.84<br>4                                                                                  | 1320.855     |              |
| <b>MnW<sub>6</sub></b>             | 57                                                                        | $\text{Na}_8\text{H}_2\text{MnW}_6\text{O}_{23}(\text{NaAc})_3(\text{HAc})(\text{OH})^{2+}$   | 1017.747     | 1017.723     |
| <b>Mn<sub>6</sub>W<sub>6</sub></b> | 58                                                                        | $\text{NaH}_{15}\text{Mn}_6\text{W}_6\text{O}_{37}(\text{H}_2\text{O})_3^{2+}$                | 1058.64<br>3 | 1058.691     |
|                                    | 59                                                                        | $\text{NaH}_{15}\text{Mn}_6\text{W}_6\text{O}_{37}(\text{H}_2\text{O})_3(\text{NaAc})^{2+}$   | 1099.64<br>5 | 1099.68<br>8 |
|                                    | 60                                                                        | $\text{NaH}_{15}\text{Mn}_6\text{W}_6\text{O}_{37}(\text{H}_2\text{O})_3(\text{NaAc})_2^{2+}$ | 1140.64<br>6 | 1140.695     |
|                                    | 61                                                                        | $\text{NaH}_{15}\text{Mn}_6\text{W}_6\text{O}_{37}(\text{H}_2\text{O})_3(\text{NaAc})_3^{2+}$ | 1181.647     | 1181.701     |
|                                    | 62                                                                        | $\text{NaH}_{15}\text{Mn}_6\text{W}_6\text{O}_{37}(\text{H}_2\text{O})_3(\text{NaAc})_4^{2+}$ | 1222.64<br>9 | 1222.69<br>9 |
|                                    | 63                                                                        | $\text{NaH}_{15}\text{Mn}_6\text{W}_6\text{O}_{37}(\text{H}_2\text{O})_3(\text{NaAc})_5^{2+}$ | 1263.651     | 1263.679     |
|                                    | 64                                                                        | $\text{NaH}_{15}\text{Mn}_6\text{W}_6\text{O}_{37}(\text{H}_2\text{O})_3(\text{NaAc})_6^{2+}$ | 1304.65<br>2 | 1304.702     |
|                                    | 65                                                                        | $\text{NaH}_{15}\text{Mn}_6\text{W}_6\text{O}_{37}(\text{H}_2\text{O})_3(\text{NaAc})_7^{2+}$ | 1345.65<br>4 | 1345.697     |

**Table S3** Assignment of the key species identified in **sol.W-Mn** in negative mode of ESI-MS tests. (Both calculated and experimental m/z values refer to the most intense peak in the isotopic envelope)

| Species        | Entry | Identification                                                                                                      | Cal. m/z | Exp. m/z |
|----------------|-------|---------------------------------------------------------------------------------------------------------------------|----------|----------|
| W <sub>1</sub> | 1     | HWO <sub>4</sub> <sup>-</sup>                                                                                       | -248.939 | -248.935 |
|                | 2     | NaWO <sub>4</sub> <sup>-</sup>                                                                                      | -270.921 | -270.933 |
|                | 3     | HWO <sub>4</sub> (NaAc) <sup>-</sup>                                                                                | -330.942 | -330.957 |
|                | 4     | NaWO <sub>4</sub> (NaAc) <sup>-</sup>                                                                               | -352.924 | -352.922 |
|                | 5     | HWO <sub>4</sub> (NaAc) <sub>2</sub> <sup>-</sup>                                                                   | -412.945 | -412.958 |
|                | 6     | NaWO <sub>4</sub> (NaAc) <sub>2</sub> <sup>-</sup>                                                                  | -434.927 | -434.927 |
|                | 7     | NaWO <sub>4</sub> (NaAc) <sub>3</sub> <sup>-</sup>                                                                  | -516.931 | -516.932 |
|                | 8     | WO <sub>4</sub> (NaAc) <sub>10</sub> <sup>2-</sup>                                                                  | -533.981 | -534.001 |
|                | 9     | NaWO <sub>4</sub> (NaAc) <sub>4</sub> <sup>-</sup>                                                                  | -598.933 | -598.938 |
|                | 10    | NaWO <sub>4</sub> (NaAc) <sub>5</sub> <sup>-</sup>                                                                  | -680.936 | -680.961 |
| W <sub>2</sub> | 11    | HW <sub>2</sub> O <sub>7</sub> <sup>-</sup>                                                                         | -480.875 | -480.876 |
|                | 12    | NaW <sub>2</sub> O <sub>7</sub> <sup>-</sup>                                                                        | -502.857 | -502.857 |
|                | 13    | Na <sub>3</sub> W <sub>2</sub> O <sub>8</sub> <sup>-</sup>                                                          | -564.832 | -564.833 |
|                | 14    | HW <sub>2</sub> O <sub>7</sub> (NaAc) <sup>-</sup>                                                                  | -562.878 | -562.901 |
| W <sub>3</sub> | 15    | Na <sub>4</sub> W <sub>3</sub> O <sub>12</sub> <sup>2-</sup>                                                        | -417.876 | -417.876 |
|                | 16    | W <sub>3</sub> O <sub>10</sub> <sup>2-</sup>                                                                        | -355.902 | -355.901 |
|                | 17    | Na <sub>4</sub> W <sub>3</sub> O <sub>12</sub> (NaAc) <sup>2-</sup>                                                 | -458.878 | -458.879 |
|                | 18    | NaW <sub>3</sub> O <sub>10</sub> (H <sub>2</sub> O) <sup>-</sup>                                                    | -752.804 | -752.798 |
| W <sub>4</sub> | 19    | W <sub>4</sub> O <sub>13</sub> <sup>2-</sup>                                                                        | -471.871 | -471.869 |
|                | 20    | NaW <sub>4</sub> O <sub>13</sub> <sup>-</sup>                                                                       | -966.729 | -966.735 |
| W <sub>5</sub> | 21    | Na <sub>2</sub> W <sub>5</sub> O <sub>17</sub> <sup>2-</sup>                                                        | -618.825 | -618.827 |
| W <sub>6</sub> | 22    | W <sub>6</sub> O <sub>19</sub> <sup>2-</sup>                                                                        | -703.806 | -703.811 |
|                | 23    | W <sub>6</sub> O <sub>19</sub> (HAc) <sub>4</sub> (H <sub>2</sub> O) <sub>3</sub> <sup>2-</sup>                     | -850.864 | -850.849 |
|                | 24    | W <sub>6</sub> O <sub>19</sub> (HAc) <sub>4</sub> (H <sub>2</sub> O) <sub>4</sub> <sup>2-</sup>                     | -859.869 | -859.857 |
|                | 25    | W <sub>6</sub> O <sub>19</sub> (HAc) <sub>2</sub> (NaAc) <sub>4</sub> (H <sub>2</sub> O) <sub>4</sub> <sup>2-</sup> | -870.859 | -870.848 |
|                | 26    | W <sub>6</sub> O <sub>19</sub> (HAc) <sub>2</sub> (NaAc) <sub>2</sub> (H <sub>2</sub> O) <sub>4</sub> <sup>2-</sup> | -881.851 | -881.841 |
|                | 27    | W <sub>6</sub> O <sub>19</sub> (HAc) <sub>2</sub> (NaAc) <sub>3</sub> (H <sub>2</sub> O) <sub>4</sub> <sup>2-</sup> | -922.853 | -922.848 |
|                | 28    | W <sub>6</sub> O <sub>19</sub> (HAc) <sub>2</sub> (NaAc) <sub>4</sub> (H <sub>2</sub> O) <sub>4</sub> <sup>2-</sup> | -963.854 | -963.853 |

| Species                            | Entry | Identification                                  | Cal. m/z  | Exp. m/z  |
|------------------------------------|-------|-------------------------------------------------|-----------|-----------|
|                                    | 29    | $W_6O_{19}(HAc)_2(NaAc)_5(H_2O)_4^{2-}$         | 1004.856  | 1004.862  |
|                                    | 30    | $W_6O_{19}(HAc)_2(NaAc)_6(H_2O)_4^{2-}$         | -1045.858 | 1045.869  |
|                                    | 31    | $W_6O_{19}(HAc)_2(NaAc)_7(H_2O)_4^{2-}$         | 1086.859  | 1086.859  |
|                                    | 32    | $W_6O_{19}(HAc)_2(NaAc)_8(H_2O)_4^{2-}$         | -1127.867 | -1127.869 |
|                                    | 33    | $W_6O_{19}(HAc)_2(NaAc)_9(H_2O)_4^{2-}$         | -1168.862 | -1168.873 |
|                                    | 34    | $W_6O_{19}(HAc)_2(NaAc)_{10}(H_2O)_4^{2-}$      | 1209.864  | -1209.872 |
|                                    | 35    | $W_6O_{19}(HAc)_2(NaAc)_{11}(H_2O)_4^{2-}$      | -1250.865 | -1250.876 |
|                                    | 36    | $W_6O_{19}(HAc)_2(NaAc)_{12}(H_2O)_4^{2-}$      | -1291.867 | -1291.871 |
|                                    | 37    | $W_6O_{19}(HAc)_6(NaAc)_2(H_2O)_7^{2-}$         | 1028.909  | -1028.838 |
|                                    | 38    | $W_6O_{19}(HAc)_6(NaAc)_3(H_2O)_7^{2-}$         | -1069.911 | -1069.841 |
|                                    | 39    | $W_6O_{19}(HAc)_6(NaAc)_4(H_2O)_7^{2-}$         | -1110.912 | -1110.851 |
|                                    | 40    | $W_6O_{19}(HAc)_6(NaAc)_5(H_2O)_7^{2-}$         | -1151.914 | -1151.862 |
|                                    | 41    | $W_6O_{19}(HAc)_6(NaAc)_6(H_2O)_7^{2-}$         | -1192.916 | -1192.856 |
| <b>Mn<sub>6</sub>W<sub>6</sub></b> | 46    | $Na_{12}Mn_6W_6O_{37}(NaAc)_4(H_2O)_8^{2-}$     | -1386.562 | -1386.634 |
|                                    | 47    | $Na_{13}Mn_6W_6O_{37}(NaAc)_5(H_2O)_8^{2-}$     | -1439.057 | -1439.106 |
|                                    | 48    | $Na_{13}Mn_6W_6O_{37}(NaAc)_6(H_2O)_8^{2-}$     | 1480.059  | 1480.099  |
|                                    | 49    | $Na_{14}Mn_6W_6O_{37}(OH)(NaAc)_6(H_2O)_7^{2-}$ | -1491.051 | -1491.088 |

**Table S4** Assignment of the key species identified in **sol.W-HAc** in positive mode of ESI-MS tests. (Both calculated and experimental m/z values refer to the most intense peak in the isotopic envelope)

| Species              | Entry | Identification          | Cal. m/z | Exp. m/z |
|----------------------|-------|-------------------------|----------|----------|
| <b>W<sub>1</sub></b> | 1     | $Na_3WO_4^+$            | 316.899  | 316.903  |
|                      | 2     | $Na_3WO_4(HAc)^+$       | 376.921  | 376.901  |
|                      | 3     | $Na_3WO_4(NaAc)^+$      | 398.902  | 398.911  |
|                      | 4     | $Na_4WO_4(NaAc)_6^{2+}$ | 415.954  | 415.976  |
|                      | 5     | $Na_4WO_4(NaAc)_7^{2+}$ | 456.955  | 456.982  |
|                      | 6     | $Na_3WO_4(NaAc)_2^+$    | 480.905  | 480.929  |
|                      | 7     | $Na_4WO_4(NaAc)_8^{2+}$ | 497.956  | 497.979  |
|                      | 8     | $Na_4WO_4(NaAc)_9^{2+}$ | 538.958  | 538.976  |
|                      | 9     | $Na_3WO_4(NaAc)_3^+$    | 562.909  | 562.933  |

| Species      | Entry | Identification                                                                        | Cal. m/z | Exp. m/z |
|--------------|-------|---------------------------------------------------------------------------------------|----------|----------|
|              | 10    | $\text{Na}_4\text{WO}_4(\text{NaAc})_{10}^{2+}$                                       | 579.959  | 579.971  |
|              | 11    | $\text{Na}_4\text{WO}_4(\text{NaAc})_{11}^{2+}$                                       | 620.961  | 620.973  |
|              | 12    | $\text{Na}_3\text{WO}_4(\text{NaAc})_4^+$                                             | 644.911  | 644.943  |
|              | 13    | $\text{Na}_4\text{WO}_4(\text{NaAc})_{12}^{2+}$                                       | 661.963  | 661.978  |
|              | 14    | $\text{Na}_4\text{WO}_4(\text{NaAc})_{13}^{2+}$                                       | 702.965  | 702.987  |
|              | 15    | $\text{Na}_3\text{WO}_4(\text{NaAc})_5^+$                                             | 726.915  | 726.923  |
|              | 16    | $\text{Na}_4\text{WO}_4(\text{NaAc})_{14}^{2+}$                                       | 743.966  | 743.977  |
|              | 17    | $\text{Na}_4\text{WO}_4(\text{NaAc})_{15}^{2+}$                                       | 784.968  | 784.988  |
| $\text{W}_2$ | 18    | $\text{Na}_5\text{W}_2\text{O}_8^+$                                                   | 610.811  | 610.827  |
|              | 19    | $\text{Na}_2\text{H}_3\text{W}_2\text{O}_8(\text{H}_2\text{O})_7^+$                   | 670.938  | 670.898  |
|              | 20    | $\text{Na}_6\text{W}_2\text{O}_8(\text{NaAc})_5^{2+}$                                 | 521.907  | 521.945  |
|              | 21    | $\text{Na}_6\text{W}_2\text{O}_8(\text{NaAc})_7^{2+}$                                 | 603.911  | 603.952  |
|              | 22    | $\text{Na}_5\text{W}_2\text{O}_8(\text{NaAc})^+$                                      | 692.813  | 692.847  |
|              | 23    | $\text{Na}_5\text{W}_2\text{O}_8(\text{NaAc})_2^+$                                    | 774.817  | 774.801  |
|              | 24    | $\text{Na}_5\text{W}_2\text{O}_8(\text{NaAc})_3^+$                                    | 856.819  | 856.778  |
| $\text{W}_3$ | 25    | $\text{Na}_8\text{W}_3\text{O}_{12}^{2+}$                                             | 463.855  | 463.849  |
|              | 26    | $\text{Na}_7\text{W}_3\text{O}_{12}^+$                                                | 904.721  | 904.702  |
|              | 27    | $\text{Na}_8\text{W}_3\text{O}_{12}(\text{NaAc})^{2+}$                                | 504.856  | 504.865  |
|              | 28    | $\text{Na}_8\text{W}_3\text{O}_{12}(\text{NaAc})_2^{2+}$                              | 545.858  | 545.842  |
|              | 29    | $\text{Na}_8\text{W}_3\text{O}_{12}(\text{NaAc})_3^{2+}$                              | 586.859  | 586.837  |
|              | 30    | $\text{Na}_8\text{W}_3\text{O}_{12}(\text{NaAc})_4^{2+}$                              | 627.861  | 627.847  |
|              | 31    | $\text{Na}_8\text{W}_3\text{O}_{12}(\text{NaAc})_7^{2+}$                              | 750.865  | 750.889  |
|              | 32    | $\text{Na}_8\text{W}_3\text{O}_{12}(\text{NaAc})_8^{2+}$                              | 791.867  | 791.876  |
|              | 33    | $\text{Na}_8\text{W}_3\text{O}_{12}(\text{NaAc})_9^{2+}$                              | 832.868  | 832.883  |
|              | 34    | $\text{Na}_8\text{W}_3\text{O}_{12}(\text{NaAc})_5^{2+}$                              | 668.863  | 668.854  |
| $\text{W}_4$ | 35    | $\text{Na}_7\text{H}_3\text{W}_4\text{O}_{16}(\text{H}_2\text{O})_7^{2+}$             | 640.874  | 640.856  |
| $\text{W}_5$ | 36    | $\text{Na}_{12}\text{W}_5\text{O}_{20}^{2+}$                                          | 757.765  | 757.786  |
|              | 37    | $\text{Na}_9\text{H}_3\text{W}_5\text{O}_{20}(\text{H}_2\text{O})_7^{2+}$             | 787.829  | 787.801  |
| $\text{W}_6$ | 38    | $\text{Na}_2\text{H}_2\text{W}_6\text{O}_{19}(\text{NaAc})_4(\text{H}_2\text{O})_4^2$ | 927.829  | 927.836  |
|              | 39    | $\text{Na}_2\text{H}_2\text{W}_6\text{O}_{19}(\text{NaAc})_5(\text{H}_2\text{O})_4^2$ | 968.831  | 968.841  |
|              | 40    | $\text{Na}_2\text{H}_2\text{W}_6\text{O}_{19}(\text{NaAc})_6(\text{H}_2\text{O})_4^2$ | 1009.832 | 1009.853 |
|              | 41    | $\text{Na}_2\text{H}_2\text{W}_6\text{O}_{19}(\text{NaAc})_7(\text{H}_2\text{O})_4^2$ | 1050.835 | 1050.856 |
|              | 42    | $\text{Na}_2\text{H}_2\text{W}_6\text{O}_{19}(\text{NaAc})_8(\text{H}_2\text{O})_4^2$ | 1091.832 | 1091.863 |
|              | 43    | $\text{Na}_2\text{H}_2\text{W}_6\text{O}_{19}(\text{NaAc})_9(\text{H}_2\text{O})_4^2$ | 1132.838 | 1132.859 |



| Species | Entry | Identification                                                                           | Cal. m/z | Exp. m/z |
|---------|-------|------------------------------------------------------------------------------------------|----------|----------|
|         | 44    | $\text{Na}_2\text{H}_2\text{W}_6\text{O}_{19}(\text{NaAc})_{10}(\text{H}_2\text{O})_4$   | 1173.839 | 1173.862 |
|         | 45    | $\text{Na}_2\text{H}_2\text{W}_6\text{O}_{19}(\text{NaAc})_{11}(\text{H}_2\text{O})_4^2$ | 1214.841 | 1214.871 |
|         | 46    | $\text{Na}_2\text{H}_2\text{W}_6\text{O}_{19}(\text{NaAc})_{12}(\text{H}_2\text{O})_4$   | 1255.842 | 1255.869 |
|         | 47    | $\text{Na}_2\text{H}_2\text{W}_6\text{O}_{19}(\text{NaAc})_{13}(\text{H}_2\text{O})_4$   | 1296.844 | 1296.871 |
|         | 48    | $\text{Na}_2\text{H}_2\text{W}_6\text{O}_{19}(\text{NaAc})_{14}(\text{H}_2\text{O})_4$   | 1337.845 | 1337.872 |
|         | 49    | $\text{Na}_2\text{H}_2\text{W}_6\text{O}_{19}(\text{NaAc})_{15}(\text{H}_2\text{O})_4$   | 1378.847 | 1378.869 |
|         | 50    | $\text{Na}_2\text{H}_2\text{W}_6\text{O}_{19}(\text{NaAc})_{16}(\text{H}_2\text{O})_4$   | 1419.849 | 1419.873 |
|         | 51    | $\text{Na}_2\text{H}_2\text{W}_6\text{O}_{19}(\text{NaAc})_{17}(\text{H}_2\text{O})_4$   | 1460.849 | 1460.778 |
|         | 52    | $\text{Na}_4\text{W}_6\text{O}_{19}(\text{NaAc})_7(\text{HAc})_4^{2+}$                   | 1156.838 | 1156.826 |
|         | 53    | $\text{Na}_4\text{W}_6\text{O}_{19}(\text{NaAc})_8(\text{HAc})_4^{2+}$                   | 1197.839 | 1197.831 |
|         | 54    | $\text{Na}_4\text{W}_6\text{O}_{19}(\text{NaAc})_9(\text{HAc})_4^{2+}$                   | 1238.841 | 1238.849 |
|         | 55    | $\text{Na}_4\text{W}_6\text{O}_{19}(\text{NaAc})_{10}(\text{HAc})_4^{2+}$                | 1279.842 | 1279.851 |
|         | 56    | $\text{Na}_4\text{W}_6\text{O}_{19}(\text{NaAc})_{11}(\text{HAc})_4^{2+}$                | 1320.844 | 1320.855 |

**Table S5** Assignment of the key species identified in **sol.W-HAc** in negative mode of ESI-MS tests. (Both calculated and experimental m/z values refer to the most intense peak in the isotopic envelope)

| Species | Entry | Identification                            | Cal. m/z | Exp. m/z |
|---------|-------|-------------------------------------------|----------|----------|
| $W_1$   | 1     | $\text{HWO}_4^-$                          | -248.939 | -248.941 |
|         | 2     | $\text{NaWO}_4^-$                         | -270.921 | -270.923 |
|         | 3     | $\text{HWO}_4(\text{NaAc})^-$             | -330.942 | -330.924 |
|         | 4     | $\text{NaWO}_4(\text{NaAc})^-$            | -352.924 | -352.929 |
|         | 5     | $\text{HWO}_4(\text{NaAc})_2^-$           | -412.945 | -412.953 |
|         | 6     | $\text{NaWO}_4(\text{NaAc})_2^-$          | -434.927 | -434.937 |
|         | 7     | $\text{NaWO}_4(\text{NaAc})_3^-$          | -516.931 | -516.943 |
|         | 8     | $\text{WO}_4(\text{NaAc})_{10}^{2-}$      | -533.981 | 534.001  |
|         | 9     | $\text{NaWO}_4(\text{NaAc})_4^-$          | -598.933 | -598.966 |
|         | 10    | $\text{NaWO}_4(\text{NaAc})_5^-$          | -680.936 | -680.973 |
| $W_2$   | 11    | $\text{HW}_2\text{O}_7^-$                 | -480.875 | -480.887 |
|         | 12    | $\text{NaW}_2\text{O}_7^-$                | -502.857 | -502.871 |
|         | 13    | $\text{Na}_3\text{W}_2\text{O}_8^-$       | -564.832 | -564.847 |
|         | 14    | $\text{HW}_2\text{O}_7(\text{NaAc})^-$    | -562.878 | -562.881 |
| $W_3$   | 15    | $\text{Na}_4\text{W}_3\text{O}_{12}^{2-}$ | -417.876 | -417.885 |

| Species              | Entry | Identification                        | Cal. m/z  | Exp. m/z  |
|----------------------|-------|---------------------------------------|-----------|-----------|
|                      | 16    | $W_3O_{10}^{2-}$                      | -355.902  | -355.899  |
|                      | 17    | $Na_4W_3O_{12}(NaAc)^{2-}$            | -458.878  | -458.889  |
|                      | 18    | $NaW_3O_{10}(H_2O)^-$                 | -752.804  | -752.843  |
| <b>W<sub>4</sub></b> | 19    | $W_4O_{13}^{2-}$                      | -471.871  | -471.896  |
|                      | 20    | $NaW_4O_{13}^-$                       | -966.729  | -966.768  |
| <b>W<sub>5</sub></b> | 21    | $Na_2W_5O_{17}^{2-}$                  | -618.825  | -618.838  |
| <b>W<sub>6</sub></b> | 22    | $W_6O_{19}^{2-}$                      | -703.806  | -703.822  |
|                      | 23    | $W_6O_{19}(HAc)_4(H_2O)_3^{2-}$       | -850.864  | -850.882  |
|                      | 24    | $W_6O_{19}(HAc)_4(H_2O)_4^{2-}$       | -859.869  | -859.845  |
|                      | 25    | $W_6O_{19}(HAc)_2(NaAc)_4(H_2O)_4^2$  | -870.859  | -870.838  |
|                      | 26    | $W_6O_{19}(HAc)_2(NaAc)_2(H_2O)_4^2$  | -881.851  | -881.874  |
|                      | 27    | $W_6O_{19}(HAc)_2(NaAc)_3(H_2O)_4^2$  | -922.853  | -922.883  |
|                      | 28    | $W_6O_{19}(HAc)_2(NaAc)_4(H_2O)_4^2$  | -963.854  | -963.841  |
|                      | 29    | $W_6O_{19}(HAc)_2(NaAc)_5(H_2O)_4^2$  | -1004.856 | -1004.845 |
|                      | 30    | $W_6O_{19}(HAc)_2(NaAc)_6(H_2O)_4^2$  | -1045.858 | -1045.851 |
|                      | 31    | $W_6O_{19}(HAc)_2(NaAc)_7(H_2O)_4^2$  | -1086.859 | -1086.857 |
|                      | 32    | $W_6O_{19}(HAc)_2(NaAc)_8(H_2O)_4^2$  | -1127.867 | -1127.864 |
|                      | 33    | $W_6O_{19}(HAc)_2(NaAc)_9(H_2O)_4$    | -1168.862 | -1168.869 |
|                      | 34    | $W_6O_{19}(HAc)_2(NaAc)_{10}(H_2O)_4$ | -1209.864 | -1209.871 |
|                      | 35    | $W_6O_{19}(HAc)_2(NaAc)_{11}(H_2O)_4$ | -1250.865 | -1250.879 |
|                      | 36    | $W_6O_{19}(HAc)_2(NaAc)_{12}(H_2O)_4$ | -1291.867 | -1291.873 |
|                      | 37    | $W_6O_{19}(HAc)_6(NaAc)_2(H_2O)_7^2$  | -1028.909 | -1028.891 |
|                      | 38    | $W_6O_{19}(HAc)_6(NaAc)_3(H_2O)_7^2$  | -1069.911 | -1069.887 |
|                      | 39    | $W_6O_{19}(HAc)_6(NaAc)_4(H_2O)_7^2$  | -1110.912 | -1110.885 |
|                      | 40    | $W_6O_{19}(HAc)_6(NaAc)_5(H_2O)_7^2$  | -1151.914 | -1151.889 |
|                      | 41    | $W_6O_{19}(HAc)_6(NaAc)_6(H_2O)_7$    | -1192.916 | -1192.877 |

**Table S6** Assignment of the key species identified in **sol.W-Mn** for crystallization course in positive mode of ESI-MS tests. (Both calculated and experimental m/z values refer to the most intense peak in the isotopic envelope)

| Species | Entry | Identification | Cal. m/z | Exp. m/z |
|---------|-------|----------------|----------|----------|
|---------|-------|----------------|----------|----------|

|                                |    |                                                                                                                                    |          |          |
|--------------------------------|----|------------------------------------------------------------------------------------------------------------------------------------|----------|----------|
| W <sub>1</sub>                 | 1  | Na <sub>3</sub> WO <sub>4</sub> <sup>+</sup>                                                                                       | 316.899  | 316.866  |
|                                | 2  | Na <sub>3</sub> WO <sub>4</sub> (HAc) <sup>+</sup>                                                                                 | 376.921  | 376.881  |
|                                | 3  | Na <sub>3</sub> WO <sub>4</sub> (NaAc) <sup>+</sup>                                                                                | 398.902  | 398.856  |
|                                | 4  | Na <sub>4</sub> WO <sub>4</sub> (NaAc) <sub>6</sub> <sup>2+</sup>                                                                  | 415.954  | 415.911  |
|                                | 5  | Na <sub>4</sub> WO <sub>4</sub> (NaAc) <sub>7</sub> <sup>2+</sup>                                                                  | 456.955  | 456.908  |
|                                | 6  | Na <sub>3</sub> WO <sub>4</sub> (NaAc) <sub>2</sub> <sup>+</sup>                                                                   | 480.905  | 480.867  |
|                                | 7  | Na <sub>4</sub> WO <sub>4</sub> (NaAc) <sub>8</sub> <sup>2+</sup>                                                                  | 497.956  | 497.905  |
|                                | 8  | Na <sub>4</sub> WO <sub>4</sub> (NaAc) <sub>9</sub> <sup>2+</sup>                                                                  | 538.958  | 538.903  |
|                                | 9  | Na <sub>3</sub> WO <sub>4</sub> (NaAc) <sub>3</sub> <sup>+</sup>                                                                   | 562.909  | 562.879  |
|                                | 10 | Na <sub>4</sub> WO <sub>4</sub> (NaAc) <sub>10</sub> <sup>2+</sup>                                                                 | 579.959  | 579.921  |
|                                | 11 | Na <sub>4</sub> WO <sub>4</sub> (NaAc) <sub>11</sub> <sup>2+</sup>                                                                 | 620.961  | 620.936  |
|                                | 12 | Na <sub>3</sub> WO <sub>4</sub> (NaAc) <sub>4</sub> <sup>+</sup>                                                                   | 644.911  | 644.896  |
|                                | 13 | Na <sub>4</sub> WO <sub>4</sub> (NaAc) <sub>12</sub> <sup>2+</sup>                                                                 | 661.963  | 661.932  |
|                                | 14 | Na <sub>4</sub> WO <sub>4</sub> (NaAc) <sub>13</sub> <sup>2+</sup>                                                                 | 702.965  | 702.966  |
|                                | 15 | Na <sub>3</sub> WO <sub>4</sub> (NaAc) <sub>5</sub> <sup>+</sup>                                                                   | 726.915  | 726.912  |
|                                | 16 | Na <sub>4</sub> WO <sub>4</sub> (NaAc) <sub>14</sub> <sup>2+</sup>                                                                 | 743.966  | 743.963  |
|                                | 17 | Na <sub>4</sub> WO <sub>4</sub> (NaAc) <sub>15</sub> <sup>2+</sup>                                                                 | 784.968  | 784.954  |
| W <sub>6</sub>                 | 18 | Na <sub>2</sub> H <sub>2</sub> W <sub>6</sub> O <sub>19</sub> (NaAc) <sub>4</sub> (H <sub>2</sub> O) <sub>4</sub> <sup>2+</sup>    | 927.829  | 927.756  |
|                                | 19 | Na <sub>2</sub> H <sub>2</sub> W <sub>6</sub> O <sub>19</sub> (NaAc) <sub>5</sub> (H <sub>2</sub> O) <sub>4</sub> <sup>2+</sup>    | 968.831  | 968.762  |
|                                | 20 | Na <sub>2</sub> H <sub>2</sub> W <sub>6</sub> O <sub>19</sub> (NaAc) <sub>6</sub> (H <sub>2</sub> O) <sub>4</sub> <sup>2+</sup>    | 1009.832 | 1009.763 |
|                                | 21 | Na <sub>2</sub> H <sub>2</sub> W <sub>6</sub> O <sub>19</sub> (NaAc) <sub>7</sub> (H <sub>2</sub> O) <sub>4</sub> <sup>2+</sup>    | 1050.834 | 1050.753 |
|                                | 22 | Na <sub>2</sub> H <sub>2</sub> W <sub>6</sub> O <sub>19</sub> (NaAc) <sub>8</sub> (H <sub>2</sub> O) <sub>4</sub> <sup>2+</sup>    | 1091.832 | 1091.758 |
|                                | 23 | Na <sub>2</sub> H <sub>2</sub> W <sub>6</sub> O <sub>19</sub> (NaAc) <sub>9</sub> (H <sub>2</sub> O) <sub>4</sub> <sup>2+</sup>    | 1132.838 | 1132.761 |
|                                | 24 | Na <sub>2</sub> H <sub>2</sub> W <sub>6</sub> O <sub>19</sub> (NaAc) <sub>10</sub> (H <sub>2</sub> O) <sub>4</sub> <sup>2+</sup>   | 1173.839 | 1173.763 |
|                                | 25 | Na <sub>2</sub> H <sub>2</sub> W <sub>6</sub> O <sub>19</sub> (NaAc) <sub>11</sub> (H <sub>2</sub> O) <sub>4</sub> <sup>2+</sup>   | 1214.841 | 1214.767 |
|                                | 26 | Na <sub>2</sub> H <sub>2</sub> W <sub>6</sub> O <sub>19</sub> (NaAc) <sub>12</sub> (H <sub>2</sub> O) <sub>4</sub> <sup>2+</sup>   | 1255.842 | 1255.766 |
|                                | 27 | Na <sub>2</sub> H <sub>2</sub> W <sub>6</sub> O <sub>19</sub> (NaAc) <sub>13</sub> (H <sub>2</sub> O) <sub>4</sub> <sup>2+</sup>   | 1296.844 | 1296.771 |
|                                | 28 | Na <sub>2</sub> H <sub>2</sub> W <sub>6</sub> O <sub>19</sub> (NaAc) <sub>14</sub> (H <sub>2</sub> O) <sub>4</sub> <sup>2+</sup>   | 1337.845 | 1337.769 |
|                                | 29 | Na <sub>2</sub> H <sub>2</sub> W <sub>6</sub> O <sub>19</sub> (NaAc) <sub>15</sub> (H <sub>2</sub> O) <sub>4</sub> <sup>2+</sup>   | 1378.847 | 1378.778 |
|                                | 30 | Na <sub>2</sub> H <sub>2</sub> W <sub>6</sub> O <sub>19</sub> (NaAc) <sub>16</sub> (H <sub>2</sub> O) <sub>4</sub> <sup>2+</sup>   | 1419.849 | 1419.801 |
|                                | 31 | Na <sub>2</sub> H <sub>2</sub> W <sub>6</sub> O <sub>19</sub> (NaAc) <sub>17</sub> (H <sub>2</sub> O) <sub>4</sub> <sup>2+</sup>   | 1460.84  | 1460.811 |
| MnW <sub>6</sub>               | 32 | Na <sub>8</sub> H <sub>2</sub> MnW <sub>6</sub> O <sub>23</sub> (NaAc) <sub>3</sub> (HAc)(OH) <sub>3</sub> <sup>2+</sup>           | 1017.747 | 1017.704 |
| Mn <sub>6</sub> W <sub>6</sub> | 34 | NaH <sub>15</sub> Mn <sub>6</sub> W <sub>6</sub> O <sub>37</sub> (H <sub>2</sub> O) <sub>3</sub> <sup>2+</sup>                     | 1058.643 | 1058.708 |
|                                | 35 | NaH <sub>15</sub> Mn <sub>6</sub> W <sub>6</sub> O <sub>37</sub> (H <sub>2</sub> O) <sub>3</sub> (NaAc) <sup>2+</sup>              | 1099.645 | 1099.708 |
|                                | 36 | NaH <sub>15</sub> Mn <sub>6</sub> W <sub>6</sub> O <sub>37</sub> (H <sub>2</sub> O) <sub>3</sub> (NaAc) <sub>2</sub> <sup>2+</sup> | 1140.646 | 1140.706 |
|                                | 37 | NaH <sub>15</sub> Mn <sub>6</sub> W <sub>6</sub> O <sub>37</sub> (H <sub>2</sub> O) <sub>3</sub> (NaAc) <sub>3</sub> <sup>2+</sup> | 1181.647 | 1181.708 |
|                                | 38 | NaH <sub>15</sub> Mn <sub>6</sub> W <sub>6</sub> O <sub>37</sub> (H <sub>2</sub> O) <sub>3</sub> (NaAc) <sub>4</sub> <sup>2+</sup> | 1222.649 | 1222.708 |
|                                | 39 | NaH <sub>15</sub> Mn <sub>6</sub> W <sub>6</sub> O <sub>37</sub> (H <sub>2</sub> O) <sub>3</sub> (NaAc) <sub>5</sub> <sup>2+</sup> | 1263.651 | 1263.707 |
|                                | 40 | NaH <sub>15</sub> Mn <sub>6</sub> W <sub>6</sub> O <sub>37</sub> (H <sub>2</sub> O) <sub>3</sub> (NaAc) <sub>6</sub> <sup>2+</sup> | 1304.652 | 1304.706 |
|                                | 41 | NaH <sub>15</sub> Mn <sub>6</sub> W <sub>6</sub> O <sub>37</sub> (H <sub>2</sub> O) <sub>3</sub> (NaAc) <sub>7</sub> <sup>2+</sup> | 1345.654 | 1345.704 |

**Table S7** Assignment of the key species identified in **sol.W-Mn** for crystallization course in negative mode of ESI-MS tests. (Both calculated and experimental m/z values refer to the most intense peak in the isotopic envelope)

| Species        | Entry | Identification                                                                                                       | Cal. m/z  | Exp. m/z  |
|----------------|-------|----------------------------------------------------------------------------------------------------------------------|-----------|-----------|
| W <sub>1</sub> | 1     | HWO <sub>4</sub> <sup>-</sup>                                                                                        | -248.939  | -248.935  |
|                | 2     | NaWO <sub>4</sub> <sup>-</sup>                                                                                       | -270.921  | -270.903  |
|                | 3     | HWO <sub>4</sub> (NaAc) <sup>-</sup>                                                                                 | -330.942  | -330.922  |
|                | 4     | NaWO <sub>4</sub> (NaAc) <sup>-</sup>                                                                                | -352.924  | -352.916  |
|                | 5     | HWO <sub>4</sub> (NaAc) <sub>2</sub> <sup>-</sup>                                                                    | -412.945  | -412.921  |
|                | 6     | NaWO <sub>4</sub> (NaAc) <sub>2</sub> <sup>-</sup>                                                                   | -434.927  | -434.907  |
|                | 7     | NaWO <sub>4</sub> (NaAc) <sub>3</sub> <sup>-</sup>                                                                   | -516.931  | -516.912  |
|                | 8     | WO <sub>4</sub> (NaAc) <sub>10</sub> <sup>2-</sup>                                                                   | -533.981  | -533.956  |
|                | 9     | NaWO <sub>4</sub> (NaAc) <sub>4</sub> <sup>-</sup>                                                                   | -598.933  | -598.907  |
|                | 10    | NaWO <sub>4</sub> (NaAc) <sub>5</sub> <sup>-</sup>                                                                   | -680.936  | -680.901  |
| W <sub>2</sub> | 11    | HW <sub>2</sub> O <sub>7</sub> <sup>-</sup>                                                                          | -480.875  | -480.881  |
|                | 12    | NaW <sub>2</sub> O <sub>7</sub> <sup>-</sup>                                                                         | -502.857  | -502.858  |
|                | 13    | HW <sub>2</sub> O <sub>7</sub> (NaAc) <sup>-</sup>                                                                   | -562.878  | -562.887  |
|                | 14    | NaW <sub>2</sub> O <sub>7</sub> (NaAc) <sup>-</sup>                                                                  | -584.861  | -584.869  |
|                | 15    | NaW <sub>2</sub> O <sub>7</sub> (NaAc) <sub>2</sub> <sup>-</sup>                                                     | -666.863  | -666.875  |
| W <sub>3</sub> | 16    | W <sub>3</sub> O <sub>10</sub> <sup>2-</sup>                                                                         | -355.902  | -355.881  |
|                | 17    | NaW <sub>3</sub> O <sub>10</sub> (H <sub>2</sub> O) <sup>-</sup>                                                     | -752.804  | -752.807  |
|                | 18    | NaW <sub>3</sub> O <sub>10</sub> (HAc) <sub>4</sub> (H <sub>2</sub> O) <sub>3</sub> <sup>-</sup>                     | -1028.909 | -1028.836 |
|                | 19    | NaW <sub>3</sub> O <sub>10</sub> (HAc) <sub>4</sub> (H <sub>2</sub> O) <sub>4</sub> <sup>-</sup>                     | -1046.921 | -1046.843 |
|                | 20    | NaW <sub>3</sub> O <sub>10</sub> (HAc) <sub>5</sub> (H <sub>2</sub> O) <sub>3</sub> <sup>-</sup>                     | -1088.931 | -1088.871 |
| W <sub>4</sub> | 21    | W <sub>4</sub> O <sub>13</sub> <sup>2-</sup>                                                                         | -471.871  | -471.889  |
|                | 22    | HW <sub>4</sub> O <sub>13</sub> <sup>-</sup>                                                                         | -944.747  | -944.651  |
|                | 23    | NaW <sub>4</sub> O <sub>13</sub> <sup>-</sup>                                                                        | -966.729  | -966.737  |
| W <sub>5</sub> | 24    | Na <sub>2</sub> W <sub>5</sub> O <sub>17</sub> <sup>2-</sup>                                                         | -618.825  | -618.793  |
|                | 25    | NaW <sub>5</sub> O <sub>16</sub> (H <sub>2</sub> O) <sub>2</sub> <sup>-</sup>                                        | -1234.686 | -1234.709 |
|                | 26    | NaW <sub>5</sub> O <sub>16</sub> (NaAc) <sub>2</sub> (HAc) <sub>3</sub> (H <sub>2</sub> O) <sub>4</sub> <sup>-</sup> | -1614.777 | -1614.723 |
| W <sub>6</sub> | 27    | W <sub>6</sub> O <sub>19</sub> <sup>2-</sup>                                                                         | -703.806  | -703.771  |
|                | 28    | W <sub>6</sub> O <sub>19</sub> (HAc) <sub>4</sub> (H <sub>2</sub> O) <sub>3</sub> <sup>2-</sup>                      | -850.864  | -850.783  |
|                | 29    | W <sub>6</sub> O <sub>19</sub> (HAc) <sub>4</sub> (H <sub>2</sub> O) <sub>4</sub> <sup>2-</sup>                      | -859.869  | -859.789  |
|                | 30    | W <sub>6</sub> O <sub>19</sub> (HAc) <sub>3</sub> (NaAc)(H <sub>2</sub> O) <sub>4</sub> <sup>2-</sup>                | -870.859  | -870.792  |
|                | 31    | W <sub>6</sub> O <sub>19</sub> (HAc) <sub>2</sub> (NaAc) <sub>2</sub> (H <sub>2</sub> O) <sub>4</sub> <sup>2-</sup>  | -881.851  | -881.776  |

| Species                            | Entry                                   | Identification                                  | Cal. m/z  | Exp. m/z  |
|------------------------------------|-----------------------------------------|-------------------------------------------------|-----------|-----------|
|                                    | 32                                      | $W_6O_{19}(HAc)_2(NaAc)_3(H_2O)_4^{2-}$         | -922.853  | -922.787  |
|                                    | 33                                      | $W_6O_{19}(HAc)_2(NaAc)_4(H_2O)_4^{2-}$         | -963.854  | -963.798  |
|                                    | 34                                      | $W_6O_{19}(NaAc)_5(H_2O)_4(HAc)_2^{2-}$         | -1004.856 | -1004.796 |
|                                    | 35                                      | $W_6O_{19}(NaAc)_6(H_2O)_4(HAc)_2^{2-}$         | -1045.858 | -1045.801 |
|                                    | 36                                      | $W_6O_{19}(NaAc)_7(H_2O)_4(HAc)_2^{2-}$         | -1086.859 | -1086.803 |
|                                    | 37                                      | $W_6O_{19}(NaAc)_8(H_2O)_4(HAc)_2^{2-}$         | -1127.867 | -1127.823 |
|                                    | 38                                      | $W_6O_{19}(NaAc)_9(H_2O)_4(HAc)_2^{2-}$         | -1168.862 | -1168.819 |
|                                    | 39                                      | $W_6O_{19}(NaAc)_{10}(H_2O)_4(HAc)_2^{2-}$      | -1209.864 | -1209.831 |
|                                    | 40                                      | $W_6O_{19}(NaAc)_{11}(H_2O)_4(HAc)_2^{2-}$      | -1250.865 | -1250.837 |
|                                    | 41                                      | $W_6O_{19}(NaAc)_{12}(H_2O)_4(HAc)_2^{2-}$      | -1291.867 | -1291.843 |
|                                    | 42                                      | $W_6O_{19}(HAc)_6(NaAc)_2(H_2O)_7^{2-}$         | -1028.909 | -1028.841 |
|                                    | 43                                      | $W_6O_{19}(HAc)_6(NaAc)_3(H_2O)_7^{2-}$         | -1069.911 | -1069.851 |
|                                    | 44                                      | $W_6O_{19}(HAc)_6(NaAc)_4(H_2O)_7^{2-}$         | -1110.912 | -1110.856 |
|                                    | 45                                      | $W_6O_{19}(HAc)_6(NaAc)_5(H_2O)_7^{2-}$         | -1151.914 | -1151.861 |
| 46                                 | $W_6O_{19}(HAc)_6(NaAc)_6(H_2O)_7^{2-}$ | -1192.916                                       | -1192.867 |           |
| <b>Mn<sub>6</sub>W<sub>6</sub></b> | 47                                      | $Na_{12}Mn_6W_6O_{37}(NaAc)_4(H_2O)_8^{2-}$     | -1386.562 | -1386.535 |
|                                    | 48                                      | $Na_{13}Mn_6W_6O_{37}(NaAc)_5(H_2O)_8^{2-}$     | -1439.057 | -1439.027 |
|                                    | 49                                      | $Na_{13}Mn_6W_6O_{37}(NaAc)_6(H_2O)_8^{2-}$     | -1480.059 | -1480.023 |
|                                    | 50                                      | $Na_{14}Mn_6W_6O_{37}(OH)(NaAc)_6(H_2O)_7^{2-}$ | -1491.051 | -1491.017 |

**Table S8** Assignment of the key species identified in **sol.W-HAc** for crystallization course in positive mode of ESI-MS tests. (Both calculated and experimental m/z values refer to the most intense peak in the isotopic envelope)

| Species              | Entry | Identification             | Cal. m/z | Exp. m/z |
|----------------------|-------|----------------------------|----------|----------|
| <b>W<sub>1</sub></b> | 1     | $Na_3WO_4^+$               | 316.899  | 316.891  |
|                      | 2     | $Na_3WO_4(HAc)^+$          | 376.921  | 376.912  |
|                      | 3     | $Na_3WO_4(NaAc)^+$         | 398.902  | 398.893  |
|                      | 4     | $Na_4WO_4(NaAc)_6^{2+}$    | 415.954  | 415.943  |
|                      | 5     | $Na_4WO_4(NaAc)_7^{2+}$    | 456.955  | 456.943  |
|                      | 6     | $Na_3WO_4(NaAc)_2^+$       | 480.905  | 480.892  |
|                      | 7     | $Na_4WO_4(NaAc)_8^{2+}$    | 497.956  | 497.943  |
|                      | 8     | $Na_4WO_4(NaAc)_9^{2+}$    | 538.958  | 538.944  |
|                      | 9     | $Na_3WO_4(NaAc)_3^+$       | 562.909  | 562.894  |
|                      | 10    | $Na_4WO_4(NaAc)_{10}^{2+}$ | 579.959  | 579.944  |
|                      | 11    | $Na_4WO_4(NaAc)_{11}^{2+}$ | 620.961  | 620.946  |

| Species | Entry | Identification                                                                              | Cal. m/z | Exp. m/z |
|---------|-------|---------------------------------------------------------------------------------------------|----------|----------|
|         | 12    | $\text{Na}_3\text{WO}_4(\text{NaAc})_4^+$                                                   | 644.911  | 644.892  |
|         | 13    | $\text{Na}_4\text{WO}_4(\text{NaAc})_{12}^{2+}$                                             | 661.963  | 661.946  |
|         | 14    | $\text{Na}_4\text{WO}_4(\text{NaAc})_{13}^{2+}$                                             | 702.965  | 702.948  |
|         | 15    | $\text{Na}_3\text{WO}_4(\text{NaAc})_5^+$                                                   | 726.915  | 726.897  |
|         | 16    | $\text{Na}_4\text{WO}_4(\text{NaAc})_{14}^{2+}$                                             | 743.966  | 743.951  |
|         | 17    | $\text{Na}_4\text{WO}_4(\text{NaAc})_{15}^{2+}$                                             | 784.968  | 784.948  |
| $W_6$   | 18    | $\text{Na}_2\text{H}_2\text{W}_6\text{O}_{19}(\text{NaAc})_4(\text{H}_2\text{O})_4^{2+}$    | 927.829  | 927.766  |
|         | 19    | $\text{Na}_2\text{H}_2\text{W}_6\text{O}_{19}(\text{NaAc})_5(\text{H}_2\text{O})_4^{2+}$    | 968.831  | 968.771  |
|         | 20    | $\text{Na}_2\text{H}_2\text{W}_6\text{O}_{19}(\text{NaAc})_6(\text{H}_2\text{O})_4^{2+}$    | 1009.832 | 1009.771 |
|         | 21    | $\text{Na}_2\text{H}_2\text{W}_6\text{O}_{19}(\text{NaAc})_7(\text{H}_2\text{O})_4^{2+}$    | 1050.834 | 1050.769 |
|         | 22    | $\text{Na}_2\text{H}_2\text{W}_6\text{O}_{19}(\text{NaAc})_8(\text{H}_2\text{O})_4^{2+}$    | 1091.832 | 1091.764 |
|         | 23    | $\text{Na}_2\text{H}_2\text{W}_6\text{O}_{19}(\text{NaAc})_9(\text{H}_2\text{O})_4^{2+}$    | 1132.838 | 1132.768 |
|         | 24    | $\text{Na}_2\text{H}_2\text{W}_6\text{O}_{19}(\text{NaAc})_{10}(\text{H}_2\text{O})_4^{2+}$ | 1173.839 | 1173.763 |
|         | 25    | $\text{Na}_2\text{H}_2\text{W}_6\text{O}_{19}(\text{NaAc})_{11}(\text{H}_2\text{O})_4^{2+}$ | 1214.841 | 1214.785 |
|         | 26    | $\text{Na}_2\text{H}_2\text{W}_6\text{O}_{19}(\text{NaAc})_{12}(\text{H}_2\text{O})_4^{2+}$ | 1255.842 | 1255.778 |
|         | 27    | $\text{Na}_2\text{H}_2\text{W}_6\text{O}_{19}(\text{NaAc})_{13}(\text{H}_2\text{O})_4^{2+}$ | 1296.844 | 1296.779 |
|         | 28    | $\text{Na}_2\text{H}_2\text{W}_6\text{O}_{19}(\text{NaAc})_{14}(\text{H}_2\text{O})_4^{2+}$ | 1337.845 | 1337.775 |
|         | 29    | $\text{Na}_2\text{H}_2\text{W}_6\text{O}_{19}(\text{NaAc})_{15}(\text{H}_2\text{O})_4^{2+}$ | 1378.847 | 1378.796 |
|         | 30    | $\text{Na}_2\text{H}_2\text{W}_6\text{O}_{19}(\text{NaAc})_{16}(\text{H}_2\text{O})_4^{2+}$ | 1419.849 | 1419.811 |
|         | 31    | $\text{Na}_2\text{H}_2\text{W}_6\text{O}_{19}(\text{NaAc})_{17}(\text{H}_2\text{O})_4^{2+}$ | 1460.849 | 1460.814 |

**Table S9** Assignment of the key species identified in **sol.W-HAc** for crystallization course in negative mode of ESI-MS tests. (Both calculated and experimental m/z values refer to the most intense peak in the isotopic envelope)

| Species | Entry | Identification                       | Cal. m/z | Exp. m/z |
|---------|-------|--------------------------------------|----------|----------|
| $W_1$   | 1     | $\text{HWO}_4^-$                     | -248.939 | -248.911 |
|         | 2     | $\text{NaWO}_4^-$                    | -270.921 | -270.893 |
|         | 3     | $\text{HWO}_4(\text{NaAc})^-$        | -330.942 | -330.926 |
|         | 4     | $\text{NaWO}_4(\text{NaAc})^-$       | -352.924 | -352.913 |
|         | 5     | $\text{HWO}_4(\text{NaAc})_2^-$      | -412.945 | -412.916 |
|         | 6     | $\text{NaWO}_4(\text{NaAc})_2^-$     | -434.927 | -434.911 |
|         | 7     | $\text{NaWO}_4(\text{NaAc})_3^-$     | -516.931 | -516.901 |
|         | 8     | $\text{WO}_4(\text{NaAc})_{10}^{2-}$ | -533.981 | -533.953 |
|         | 9     | $\text{NaWO}_4(\text{NaAc})_5^-$     | -680.936 | -680.967 |
|         | 10    | $\text{NaWO}_4(\text{NaAc})_4^-$     | -598.933 | -598.911 |
| $W_2$   | 11    | $\text{HW}_2\text{O}_7^-$            | -480.875 | -480.869 |
|         | 12    | $\text{NaW}_2\text{O}_7^-$           | -502.857 | -502.806 |

| Species      | Entry | Identification                                                                       | Cal. m/z      | Exp. m/z      |
|--------------|-------|--------------------------------------------------------------------------------------|---------------|---------------|
|              | 13    | $\text{HW}_2\text{O}_7(\text{NaAc})^-$                                               | -562.878      | -562.862      |
|              | 14    | $\text{NaW}_2\text{O}_7(\text{NaAc})^-$                                              | -584.861      | -584.857      |
|              | 15    | $\text{NaW}_2\text{O}_7(\text{NaAc})_2^-$                                            | -666.863      | -666.851      |
| $\text{W}_3$ | 16    | $\text{W}_3\text{O}_{10}^{2-}$                                                       | -355.902      | -355.872      |
|              | 17    | $\text{NaW}_3\text{O}_{10}(\text{H}_2\text{O})^-$                                    | -752.804      | -752.792      |
|              | 18    | $\text{NaW}_3\text{O}_{10}(\text{HAc})_4(\text{H}_2\text{O})_3^-$                    | -<br>1028.909 | -1028.836     |
|              | 19    | $\text{NaW}_3\text{O}_{10}(\text{HAc})_4(\text{H}_2\text{O})_4^-$                    | -1046.921     | -1046.843     |
|              | 20    | $\text{NaW}_3\text{O}_{10}(\text{HAc})_5(\text{H}_2\text{O})_3^-$                    | -1088.931     | -1088.871     |
| $\text{W}_4$ | 21    | $\text{W}_4\text{O}_{13}^{2-}$                                                       | -471.871      | -471.843      |
|              | 22    | $\text{HW}_4\text{O}_{13}^-$                                                         | -944.747      | -944.678      |
|              | 23    | $\text{NaW}_4\text{O}_{13}^-$                                                        | -966.729      | -966.699      |
| $\text{W}_5$ | 24    | $\text{Na}_2\text{W}_5\text{O}_{17}^{2-}$                                            | -618.825      | -618.783      |
|              | 25    | $\text{NaW}_5\text{O}_{16}(\text{H}_2\text{O})_2^-$                                  | -1234.686     | -1234.701     |
|              | 26    | $\text{NaW}_5\text{O}_{16}(\text{NaAc})_2(\text{HAc})_3(\text{H}_2\text{O})_4^-$     | -1614.777     | -1614.701     |
| $\text{W}_6$ | 27    | $\text{W}_6\text{O}_{19}^{2-}$                                                       | -703.806      | -703.773      |
|              | 28    | $\text{W}_6\text{O}_{19}(\text{HAc})_4(\text{H}_2\text{O})_3^{2-}$                   | -850.864      | -850.820      |
|              | 29    | $\text{W}_6\text{O}_{19}(\text{HAc})_4(\text{H}_2\text{O})_4^{2-}$                   | -859.869      | -859.811      |
|              | 30    | $\text{W}_6\text{O}_{19}(\text{HAc})_3(\text{NaAc})(\text{H}_2\text{O})_4^{2-}$      | -870.859      | -870.801      |
|              | 31    | $\text{W}_6\text{O}_{19}(\text{HAc})_2(\text{NaAc})_2(\text{H}_2\text{O})_4^{2-}$    | -881.851      | -881.807      |
|              | 32    | $\text{W}_6\text{O}_{19}(\text{HAc})_2(\text{NaAc})_3(\text{H}_2\text{O})_4^{2-}$    | -922.853      | -922.814      |
|              | 33    | $\text{W}_6\text{O}_{19}(\text{HAc})_2(\text{NaAc})_4(\text{H}_2\text{O})_4^{2-}$    | -963.854      | -963.908      |
|              | 34    | $\text{W}_6\text{O}_{19}(\text{NaAc})_5(\text{H}_2\text{O})_4(\text{HAc})_2^{2-}$    | -<br>1004.856 | -1004.801     |
|              | 35    | $\text{W}_6\text{O}_{19}(\text{NaAc})_6(\text{H}_2\text{O})_4(\text{HAc})_2^{2-}$    | -1045.858     | -1045.808     |
|              | 36    | $\text{W}_6\text{O}_{19}(\text{NaAc})_7(\text{H}_2\text{O})_4(\text{HAc})_2^{2-}$    | -<br>1086.859 | -<br>1086.802 |
|              | 37    | $\text{W}_6\text{O}_{19}(\text{NaAc})_8(\text{H}_2\text{O})_4(\text{HAc})_2^{2-}$    | -1127.867     | -1127.821     |
|              | 38    | $\text{W}_6\text{O}_{19}(\text{NaAc})_9(\text{H}_2\text{O})_4(\text{HAc})_2^{2-}$    | -1168.862     | -1168.811     |
|              | 39    | $\text{W}_6\text{O}_{19}(\text{NaAc})_{10}(\text{H}_2\text{O})_4(\text{HAc})_2^{2-}$ | -<br>1209.864 | -1209.837     |
|              | 40    | $\text{W}_6\text{O}_{19}(\text{NaAc})_{11}(\text{H}_2\text{O})_4(\text{HAc})_2^{2-}$ | -1250.865     | -1250.834     |
|              | 41    | $\text{W}_6\text{O}_{19}(\text{NaAc})_{12}(\text{H}_2\text{O})_4(\text{HAc})_2^{2-}$ | -1291.867     | -1291.843     |
|              | 42    | $\text{W}_6\text{O}_{19}(\text{HAc})_6(\text{NaAc})_2(\text{H}_2\text{O})_7^{2-}$    | -<br>1028.909 | -<br>1028.889 |
|              | 43    | $\text{W}_6\text{O}_{19}(\text{HAc})_6(\text{NaAc})_3(\text{H}_2\text{O})_7^{2-}$    | -1069.911     | -1069.877     |
|              | 44    | $\text{W}_6\text{O}_{19}(\text{HAc})_6(\text{NaAc})_4(\text{H}_2\text{O})_7^{2-}$    | -1110.912     | -1110.845     |
|              | 45    | $\text{W}_6\text{O}_{19}(\text{HAc})_6(\text{NaAc})_5(\text{H}_2\text{O})_7^{2-}$    | -1151.914     | -1151.874     |
|              | 46    | $\text{W}_6\text{O}_{19}(\text{HAc})_6(\text{NaAc})_6(\text{H}_2\text{O})_7^{2-}$    | -1192.916     | -1192.865     |
